1 **Microbial community shifts reflect losses of native soil carbon with pyrogenic and fresh**  
2 **organic matter additions and are greatest in low-carbon soils**

3  
4 Thea Whitman<sup>a,b,#</sup>, Silene DeCiucies<sup>b</sup>, Kelly Hanley<sup>b</sup>, Akio Enders<sup>b</sup>, Jamie Woolet<sup>a</sup>, and  
5 Johannes Lehmann<sup>b,c</sup>

6  
7 a. Department of Soil Science, University of Wisconsin, Madison, WI 53706, USA

8 b. Soil and Crop Sciences, School of Integrative Plant Science, Cornell University, Ithaca, NY  
9 14850, USA

10 c. Atkinson Center for a Sustainable Future, Cornell University, Ithaca, NY 149850, USA

11 # Corresponding author at 1525 Observatory Dr., Madison, WI, 53706, USA; email:

12 twhitman@wisc.edu  
13  
14

15 **Abstract**

16 Soil organic carbon (SOC) plays an important role in regulating global climate change, carbon  
17 and nutrient cycling in soils, and soil moisture. Organic matter (OM) additions to soils can affect  
18 the rate at which SOC is mineralized by microbes, with potentially important effects on SOC  
19 stocks. Understanding how pyrogenic organic matter (PyOM) affects the cycling of native SOC  
20 (nSOC) and the soil microbes responsible for these effects is important for fire-affected  
21 ecosystems as well as for biochar-amended systems. We used an incubation trial with five  
22 different soils from National Ecological Observatory Network sites across the US and <sup>13</sup>C-  
23 labelled 350°C corn stover PyOM and fresh corn stover OM to trace nSOC-derived CO<sub>2</sub>  
24 emissions with and without PyOM and OM amendments. We used high-throughput sequencing  
25 of rRNA genes to characterize bacterial, archaeal, and fungal communities and their response to  
26 PyOM and OM. We found that the effects of amendments on nSOC-derived CO<sub>2</sub> reflected the  
27 unamended soil C status, where amendments increased C mineralization the most in low-C soils.  
28 OM additions produced much greater effects on nSOC-CO<sub>2</sub> emissions than PyOM additions.  
29 Furthermore, the magnitude of microbial community composition change mirrored the  
30 magnitude of increases in nSOC-CO<sub>2</sub>, indicating a specific subset of microbes were likely  
31 responsible for the observed changes in nSOC mineralization. However, PyOM responders  
32 differed across soils and did not necessarily reflect a common “charosphere”. Overall, this study  
33 suggests that soils that already have low SOC may be particularly vulnerable to short-term  
34 increases in SOC loss with OM or PyOM additions.  
35

## 36 **Importance**

37 Soil organic matter (SOM) has an important role in global climate change, carbon and nutrient  
38 cycling in soils, and soil moisture dynamics. Understanding the processes that affect SOM stocks  
39 is important for managing these functions. Recently, understanding how fire-affected, or  
40 “pyrogenic” organic matter (PyOM) affects existing SOM stocks has become increasingly  
41 important, both due to changing fire regimes, and to interest in “biochar” – pyrogenic organic  
42 matter that is produced intentionally for carbon management or as an agricultural soil  
43 amendment. We found that soils with less SOM were more prone to increased losses with PyOM  
44 (and fresh organic matter) additions, and that soil microbial communities changed more in soils  
45 that also had greater SOM losses with PyOM additions. This suggests that soils that already have  
46 low SOM content may be particularly vulnerable to short-term increases in SOM loss, and that a  
47 subset of the soil microbial community is likely responsible for these effects.

48

## 49 **Introduction**

50

51 Soil organic matter (SOM) supports a wealth of benefits in soil systems, including providing  
52 organic nutrients, binding toxic compounds, increasing soil water holding capacity, and storing  
53 soil organic carbon (SOC). Globally, soils hold large stocks of carbon (C) – twice the amount of  
54 C held in living biomass or in the atmosphere (1). Understanding the processes that control the  
55 stocks and fluxes of C in and out of the soils is thus essential for mitigating climate change, as  
56 well as for sustainable agricultural management (2). Recently, the importance of understanding  
57 the role of pyrogenic, or fire-affected, organic matter (PyOM) (*sensu* Zimmerman and Mitra (3))  
58 in contributing to SOC stocks has become increasingly salient. PyOM plays an important role in  
59 contributing to soil carbon stocks, particularly in fire-affected ecosystems (4), and can represent  
60 over 60% of total SOC (5). Its persistence in soils has led to interest in its role in offsetting the  
61 climate impacts of natural wildfires (4) as well as the possibility of its intentional production for  
62 the stabilization of organic matter (OM), in which case it is often referred to as “biochar” (6, 7).  
63 However, in order to quantify its net effect on C stocks and fluxes, it is essential to understand  
64 not only the persistence of pyrogenic C (PyC) itself, but also its effect on the native SOC (nSOC)  
65 present before PyC additions.

66

67 After interest was sparked in the potential of PyC for climate change mitigation just over a  
68 decade ago, alarm bells were sounded about the possibility of its addition to soils resulting in  
69 increased loss of nSOC and increased CO<sub>2</sub> emissions (8-10). These observations sparked a flurry  
70 of research into the potential interactions between added PyC and nSOC. This research was  
71 important, because if PyOM additions are to be used for climate change mitigation, it must not  
72 be offset by increased nSOC losses. Initial investigations revealed a range of responses, spanning  
73 from large increases in nSOC mineralization to large decreases in SOC mineralization with  
74 PyOM additions (11-13). (Although the term “priming” (14) is widely-used to describe this  
75 phenomenon, due to broad interpretations of the term (15), we will refer to “increased or  
76 decreased mineralization”; even though less concise, this method- and process-agnostic term will  
77 help ensure clarity and avoid prior expectations of what the term “priming” implies.) Research  
78 over the past decade has progressed beyond observation of the phenomenon to systematic  
79 investigations of the mechanisms underlying these interactions (16-18), while the conclusions  
80 from meta-analyses have strengthened as the total number of studies of PyOM-SOC interactions  
81 has steadily increased (19-22).

82

83 The above-cited meta-analyses provide a robust overview of recent advances in the literature.  
84 Briefly, current understanding of mechanisms underlying interactive effects of PyOM additions  
85 on SOC mineralization includes the following observations (19-22): (1) In general, when  
86 changes in mineralization do occur, net increases in nSOC mineralization tend to be limited to  
87 the earlier stages of incubations or field studies, while net decreases in nSOC mineralization  
88 often emerge later. (2) It is essential to consider the specific properties of PyOM and the soil to  
89 which it is applied together. Properties such as pH, total nSOC content, nutrient status, and  
90 texture or particle size are important determining factors of the net C effects of PyOM additions  
91 on nSOC. (3) Specific researcher-determined conditions of the study can significantly determine  
92 the effects of interest. This is particularly true for moisture and duration of the experiment.  
93 Although the above factors make it challenging to collectively develop a predictive  
94 understanding of interactions between SOC and PyOM mineralization, it is important to design  
95 experiments explicitly to test for and quantify the relative importance of specific mechanisms. In  
96 this spirit, in this study, we sought to investigate short-term increases in SOC mineralization with  
97 PyOM amendments. Although numerous studies have now observed net decreases in SOC

98 mineralization with PyOM amendments over the long term, characterization of the mechanisms  
99 that underpin both of these phenomena will help us develop appropriate models for predicting  
100 long-term effects into the future (23, 24). For example, in a C cycling model designed to predict  
101 the long-term effects of PyOM on C stocks (23), the assumption is that the dominant mechanism  
102 of decreased SOC mineralization is sorption of SOC by the PyOM, which is represented in the  
103 model by decreasing the fraction of SOC that is partitioned to the more rapidly-cycling pool.  
104 However, the assumption for increased SOC mineralization is that the dominant mechanism is  
105 increased microbial activity, which is represented in the model by increasing the rate at which  
106 nSOC is mineralized. These assumptions create a model structure that helps drive the model's  
107 predictions of long-term net decreases in nSOC mineralization with PyOM additions. Although  
108 increases in nSOC mineralization rates after PyOM additions seem to be limited to short- and  
109 medium (<2 year) timelines (21, 22), we wanted to investigate these short-term effects, since  
110 they pose the greatest risk of unintended consequences for nSOC stocks during intentional  
111 PyOM additions as biochar for C management or for increased nSOC losses due to PyOM inputs  
112 after wildfires.

113  
114 Commonly proposed mechanisms for short-term increases in nSOC mineralization with PyOM  
115 additions can be broadly grouped in two: (A) *co-metabolism*: easily mineralizable PyOM  
116 fractions increase microbial activity, resulting in additional decomposition of SOC; (B)  
117 *stimulation*: PyOM additions may result in changes to the soil chemical or physical environment  
118 that generally favour increased microbial activity, such as more optimal pH, nutrient, oxygen, or  
119 water conditions (19, 20). In addition, *community composition shifts* could also help explain  
120 these phenomena (25). It is possible that PyOM additions could induce changes to the microbial  
121 community composition that shift the community toward taxa that favour different sources of  
122 organic matter, or process organic matter differently – *e.g.*, organisms with different carbon use  
123 efficiencies (CUE) (18). Finally, researchers often distinguish these effects from “apparent  
124 priming” – when total CO<sub>2</sub> emissions from soil increase, but this increase is not accompanied by  
125 increases in nSOC losses (15). Rather, the increase is attributed to increased turnover of soil  
126 microbial biomass. While the effects included under *stimulation* are essential to understand in  
127 order to predict SOC fluxes, they are – mechanistically – comparably straightforward:  
128 researchers have long studied the effects of changing moisture or oxygen on SOC fluxes. If we

129 are able to quantify the degree to which PyOM additions to soil change these properties, we will  
130 be on our way to predicting their effects on nSOC cycling. However, the effects included under  
131 *co-metabolism* and *community composition shifts* are generally less well-characterized, and it is  
132 these mechanisms that we specifically sought to investigate in this study.

133

134 While research into the mechanisms behind changes in SOC mineralization with PyOM  
135 additions has grown substantially over the last decade, our understanding of which microbes  
136 respond to PyOM additions, and the reasons for their response, has somewhat lagged behind,  
137 particularly for fungi. As an exception to this, the recent investigation by Yu *et al.* into the  
138 effects of PyOM on SOC mineralization included an assessment of bacteria and fungi, using  
139 high-throughput sequencing, through which they identified that the relative abundance of fungal  
140 classes *Sordariomycetes* and *Tremellomycetes* were significantly positively correlated with  
141 increases in SOC mineralization after 40 days of incubation (26). In our recent review of PyOM  
142 effects on soil bacterial communities (27), we re-analyzed papers published before 2018 that had  
143 publicly accessible data and used Illumina high-throughput sequencing of the 16S ribosomal  
144 RNA gene to characterize soil bacterial communities (25, 28-32). Using the same approach to  
145 reanalyze all datasets, we found the following: (A) although most communities were  
146 significantly altered by the addition of PyOM, rather than creating a “charosphere”-dominated  
147 community (33, 34), PyOM-amended soil bacterial communities resembled their corresponding  
148 unamended soil communities more closely than they resembled different soils that had also been  
149 amended with PyOM; (B) phylum-level responses to PyOM additions were not consistent across  
150 different soil and PyOM combinations – *i.e.*, taxonomic level is generally too broad to make  
151 meaningful conclusions about soil bacterial responses to PyOM; and (C) a small number of taxa  
152 were identified as being PyOM-responders in more than one study, most of which came from the  
153 phyla *Actinobacteria* and *Proteobacteria* (27). Based on these findings, we would suggest that  
154 the field is still too nascent to make broad generalizations about any kind of consistent effect of  
155 PyOM on microbial communities, and hope that continuing to blend functional measurements  
156 with microbial response data will help to identify which specific microbes might be responsible  
157 for changes in nSOC mineralization with PyOM additions, while also generally increasing our  
158 understanding of which microbes respond to PyOM additions and why.

159

160 In this study, we had two research questions, with alternate hypotheses for each. Our first  
161 question was, are soils with less SOC or less mineralization more prone to stimulation by PyOM  
162 additions? Our primary hypothesis was that soils with less nSOC mineralization are more likely  
163 to experience increased mineralization with PyOM additions via *co-metabolism*. Our rationale  
164 was that these microbial communities are more likely to be C-limited, and the addition of (the  
165 easily-mineralizable fraction of) PyOM could alleviate this constraint (16). On the other hand,  
166 our alternate hypothesis rationalized the opposite: soils with less nSOC or less mineralization  
167 may be less likely to experience increased short-term mineralization with PyOM additions. This  
168 could occur if the microbial communities were limited by mineral nutrients. If PyOM additions  
169 alleviated this constraint via *stimulation*, microbial communities in soils with more mineralizable  
170 OC might be better able to take advantage of this subsidy. Our second question was, do soil  
171 microbial communities reflect changes in nSOC mineralization with PyOM additions? Our  
172 primary hypothesis was that there would be larger changes to the microbial community in the  
173 soils where PyOM additions increased nSOC mineralization, while microbial communities in  
174 soils that did not experience increased nSOC mineralization would not change as much. The  
175 rationale was that groups of microbes that respond positively to PyOM additions may be the  
176 same groups that are responsible for increased nSOC mineralization with PyOM additions, so a  
177 stronger shift toward these groups may accompany a stronger effect on nSOC mineralization.  
178 Our first alternate hypothesis was that PyOM might change microbial communities similarly in  
179 all soils – if PyOM additions had a very strong effect on the microbial community composition,  
180 creating a consistent “charosphere” community, differences from one soil to the next might be  
181 too subtle in comparison to detect. Our second alternate hypothesis was that we might not see  
182 substantial community shifts at all with PyOM additions. Although previous studies have seen  
183 significant changes to microbial communities with PyOM additions (27), these studies have  
184 often added extremely high amounts of PyOM. When applied at environmentally relevant rates,  
185 while PyOM additions may provide an additional C source, it may be relatively small in  
186 comparison to available nSOC, and any effects of PyOM additions on soil water-holding  
187 capacity, pH, or nutrient availability may not be large enough to clearly affect the soil microbial  
188 community composition.  
189



190 In order to investigate these questions, we selected five different soils with a range of SOC  
191 stocks and associated mineralization rates and applied  $^{13}\text{C}$ -labelled PyOM produced at  $350^\circ\text{C}$   
192 from corn (*Zea mays* L.) stover as well as the original  $^{13}\text{C}$ -labelled corn stover OM, tracing  $\text{CO}_2$   
193 fluxes continuously over one month, and characterizing the response of the soil microbial  
194 community using high-throughput sequencing of the bacterial and archaeal (16S) and fungal  
195 (ITS2) communities.

196

## 197 **Materials and Methods**

198

### 199 *Experimental overview*

200

201 We incubated five contrasting soils from sites across the United States (Table 1), adding  $^{13}\text{C}$ -  
202 labelled corn stover (“OM”), PyOM produced at  $350^\circ\text{C}$  from the same corn stover (“PyOM”), or  
203 no additions (“Soil”). We monitored  $\text{CO}_2$  fluxes over four weeks and used stable isotope  
204 partitioning to separate  $\text{CO}_2$  emissions into SOC- and amendment-derived pools. We  
205 characterized the microbial (bacterial/archaeal and fungal) communities after 24 hours, 10 days,  
206 and 26 days using ribosomal RNA gene sequencing.

207

### 208 *Soil descriptions*

209

210 Soil properties are described in Table 1. Four of the soils were collected from National  
211 Ecological Observatory Network (NEON) sites following NEON protocols in 2009-2010, as part  
212 of a NEON prototype study, from the top 0-0.1 m of the A horizon (35). We added a local non-  
213 NEON site in which we had previously investigated PyOM effects on SOC cycling and  
214 microbial communities (the Fragiudept / NY site). Each sample was from a single core, except  
215 for the Cryaquept and Fragiudept, which were from composited cores. Samples were stored at -  
216  $80^\circ\text{C}$  until experimental initiation, except for being shipped overnight to Ithaca, NY on dry ice.  
217 Clearly, this treatment would be expected to have an effect on the specific soil community  
218 composition. Due to logistical constraints in collecting fresh soils from all sites, we worked with  
219 frozen samples. Thus, we would expect our findings for these soils with respect to the dominant  
220 mechanisms at work to remain applicable in other systems, while the specific effects (*e.g.*,

221 baseline abundances of individual taxa or absolute magnitude of CO<sub>2</sub> fluxes) should not be  
222 directly translated to natural ecosystems.

223

| Source                           | Soil Type                | C (%) | N (%) | Ca (mg kg <sup>-1</sup> ) | Mg (mg kg <sup>-1</sup> ) | Na (mg kg <sup>-1</sup> ) | K (mg kg <sup>-1</sup> ) | pH  |
|----------------------------------|--------------------------|-------|-------|---------------------------|---------------------------|---------------------------|--------------------------|-----|
| Laupahoehoe, HI                  | Typic Hydrudand          | 33.1  | 2.0   | 492                       | 137                       | 29                        | 86                       | 5.0 |
| Caribou Creek-Poker Flats, AK    | Pergelic Cryaquept       | 9.4   | 0.4   | 540                       | 68                        | 16                        | 20                       | 5.0 |
| Ithaca, NY                       | Typic Fragiudept         | 4.6   | 0.4   | 1219                      | 202                       | 87                        | 119                      | 5.1 |
| Onaqui, UT                       | Xeric Haplocalcid        | 2.6   | 0.1   | 5619                      | 245                       | 28                        | 511                      | 8.3 |
| Ordway-Swisher Biol. Station, FL | Lamellic Quartzipsamment | 0.5   | 0.02  | 77                        | 14                        | 11                        | 8                        | 5.2 |

224

225 *Corn stover and PyOM amendment production*

226

227 <sup>13</sup>C pulse-labelled corn (*Zea mays* (L.)) shoot biomass was grown, ground (<2 mm), and  
228 pyrolyzed at 350 °C under Ar gas in a modified muffle furnace as previously described in detail  
229 (36). Amendment properties are reported in Supplemental Table 1.

230

231 *Incubation setup and monitoring*

232

233 Frozen samples were thawed, sieved <2 mm, and air-dried at room temperature, until mass  
234 stabilized with losses changing by less than 1% per day. A sub-sample was rapidly dried at 70 °C  
235 in a drying oven and used to determine moisture-holding capacity individually for each soil, with  
236 each amendment, in order to ensure that all samples are at equivalent moisture levels, given that  
237 amendments might affect water holding capacity. To do this, we weighed the soil samples  
238 (amended or unamended) into a PVC tube with a screen covered by a moist filter paper at the  
239 bottom. The tubes were placed in a container and water was slowly added to the container until  
240 the samples were saturated and the level of the water was level to the surface of the soil. The  
241 saturated soils were let stand overnight. In the morning, they were removed from the water bath,  
242 and allowed to drain freely overnight, covered in parafilm. The mass of water remaining in the  
243 soil was taken to represent “field capacity” (FC), with a target moisture value for incubation of



244 65% FC. We also calculated the final moisture content of the air-dried soil, to enable us to  
245 calculate the water required to reach this value for the incubations.  
246  
247 We prepared separate incubation vials for each treatment to be sampled at each timepoint. This  
248 was done so that we could destructively sample them completely, in order to ensure  
249 representative sampling, and so that we could be certain of the masses in the remaining  
250 incubation jars. For vials with amendments, we added OM at 3% by mass, and added PyOM on a  
251 pre-pyrolysis mass basis, which resulted in a 0.99% by mass addition. *I.e.*, we added the mass of  
252 PyOM that would have remained if we used the same amount of initial biomass to produce  
253 PyOM, essentially asking the systems-level question, “What might the fate of this biomass be?”.  
254 Based on our expectations for CO<sub>2</sub> flux rates from previous experiments, we determined that we  
255 would require 1 g soil per incubation for the high-organic matter soils (Typic Hydrudand and  
256 Perigelic Cryaquept), and 5 g per incubation for the lower organic matter soils, in order to make  
257 sure that CO<sub>2</sub> fluxes remained within the optimal range for our instrumentation setup. For the 24  
258 h timepoints, we used 2 g of soil. Each jar – amended and unamended – was stirred to mix. The  
259 experiment was initiated (t<sub>0</sub>) for each jar when water was added to bring it up to 65% FC. At  
260 wet-up, each jar received water drop-wise, to gradually bring it up to the target moisture level.  
261 The vial for the 24-h timepoint was incubated at 30 °C for 24 h in Mason jars with 20 mL DIW  
262 in the bottom to maintain a moist environment, and was then destructively sampled for microbial  
263 community composition after exactly 24 h, by collecting the entire sample in a Whirl-Pak bag.  
264 The sample was immediately frozen at -80 °C and stored until DNA extraction, except for  
265 overnight shipment on dry ice to Madison, WI. The two vials for the two later timepoints – 10 d  
266 and 26 d – were placed in the same quart-size Mason jar, along with 20 mL DIW in the bottom  
267 of the Mason jar to maintain a moist environment. The Mason jar was then sealed with a lid with  
268 tubing connected to the gas monitoring system. Because each full measurement cycle on the gas  
269 monitoring system takes 20 minutes, one experimental treatment was wet up every 20 minutes,  
270 taking care to attach it to the gas monitoring system at the corresponding time. The jars were  
271 automatically sampled using a custom-built multiplexer system (See (17) for details), connected  
272 to a Cavity Ring-Down Spectrometer (Picarro G2201-I, Santa Clara, CA, USA) that measures  
273 CO<sub>2</sub> concentrations and <sup>13</sup>CO<sub>2</sub>/<sup>12</sup>CO<sub>2</sub> isotopes. Measurements were made on a continuous  
274 monitoring cycle, which resulted in each Mason jar being measured about once a day. After 10

275 days, jars were opened, and one vial was randomly removed to be destructively sampled for  
276 microbial community characterization. Mason jars were removed and returned on a time cycle to  
277 ensure that each vial was sampled at the equivalent time since wet-up. After 26 days, the second  
278 vial was removed and destructively sampled for microbial community characterization.

279

### 280 *DNA extraction and sequencing*

281

282 DNA extractions were performed for each sample and for the original materials (OM and  
283 PyOM), with one blank extraction for every 24 samples (identical methods but using empty  
284 tubes, all of which were sequenced). We used a DNEasy PowerLyzer PowerSoil DNA extraction  
285 kit (QIAGEN, Germantown, MD) following manufacturer's instructions and bead-beating  
286 samples for 45 s at  $6 \text{ m s}^{-1}$  on a FastPrep 5G homogenizer (MP Biomedicals, Santa Ana, CA).  
287 Extracted DNA was amplified in triplicate PCR, targeting the 16S rRNA gene v4 region  
288 (henceforth, "16S") with 515f and 806r primers (37), and targeting the ITS2 gene region with  
289 5.8S-Fun and ITS4-Fun primers (38) with barcodes and Illumina sequencing adapters added as  
290 per (39) (all primers in Supplemental Tables 2-4). The PCR amplicon triplicates were pooled,  
291 purified and normalized using a SequalPrep Normalization Plate (96) Kit (ThermoFisher  
292 Scientific, Waltham, MA). Samples, including blanks, were pooled and library cleanup was  
293 performed using a Wizard SV Gel and PCR Clean-Up System A9282 (Promega, Madison, WI).  
294 The pooled library was submitted to the UW Madison Biotechnology Center (UW-Madison, WI)  
295 for 2x250 paired end (PE) Illumina MiSeq sequencing for the 16S amplicons and 2x300 PE for  
296 the ITS2 amplicons.

297

### 298 *Microbial community bioinformatics*

299

300 For 16S reads (32k min, 208k max, 58k median total sequenced reads), we quality-filtered and  
301 trimmed, dereplicated and learned errors, assigned operational taxonomic units (OTUs), and  
302 removed chimeras, using dada2 (40) as implemented in R (mean 53% of initial reads remaining  
303 after full pipeline; 15k min, 180k max, 29k median total final reads). Taxonomy was assigned to  
304 the 16S reads using a naïve Bayes classifier (41) trained on the 515f-806r region of the 99% ID  
305 OTUs from the Silva nr 132 database(42) (Yilmaz *et al.*, 2014) as implemented in QIIME2 (43).

306 We removed any OTUs classified as chloroplasts or mitochondria. For ITS2 reads (21k min,  
307 289k max, 62k median total sequenced reads), we first merged reads using PEAR (44), and then  
308 performed the same steps as described for 16S above (mean 50% of initial reads remaining after  
309 full pipeline; 6k min, 199k max, 32k median total final reads). Taxonomy was assigned to the  
310 ITS2 reads using the UNITE general release dynamic threshold database (02.02.2019) (UNITE,  
311 2019) using a naïve Bayes classifier (41) as implemented in dada2 (40). We removed any OTUs  
312 that did not receive a classification at the phylum level in order to exclude any non-fungal ITS2  
313 sequences. High-memory-intensive sequence processing steps were performed on the UW-  
314 Madison Centre for High Throughput Computing cluster (Madison, WI).

315

### 316 *Stable isotope CO<sub>2</sub> flux partitioning*

317

318 Respiration data were analyzed as per (17) using R version 3.6.1 (45). Sample respiration was  
319 partitioned between the amendment-derived CO<sub>2</sub>-C and soil-derived CO<sub>2</sub>-C using the following  
320 equations (46):

321

$$322 \delta_{measured} = \delta_{soil} * f_{soil} + \delta_{amendment} * f_{amendment}$$

$$323 CO_2-C_{total} = CO_2-C_{soil} + CO_2-C_{amendment}$$

324

325 where  $\delta$  represents the  $\delta^{13}C$  signature (with respect to the PeeDee Belemnite standard) of the  
326 total respired CO<sub>2</sub>-C ( $\delta_{measured}$ ), the soil-derived CO<sub>2</sub> ( $\delta_{soil}$ ), or the amendment-derived CO<sub>2</sub>-C  
327 ( $\delta_{amendment}$ ), and  $f$  represents the fraction of the total CO<sub>2</sub>-C derived from the soil ( $f_{soil}$ ) or the  
328 amendment ( $f_{amendment}$ ).  $\delta^{13}C$  of bulk PyOM ( $\delta_{PyOM}$ ) or bulk OM ( $\delta_{OM}$ ) was used as the  
329 amendment endmember for isotope partitioning. Soil isotope endmembers ( $\delta_{soil}$ ) to be used in  
330 isotope partitioning were obtained daily using the average  $\delta^{13}C$  for CO<sub>2</sub>-C from control  
331 (unamended) treatments (See supplemental R scripts). We interpret values that do not overlap  
332 within a 95% confidence interval as being significantly different.

333

### 334 *Microbial community analyses*

335

336 We worked primarily in Jupyter notebooks, with phyloseq (47), ggplot (48), and dplyr (49) being  
337 instrumental in working with the data in R (45). We compared community composition across  
338 samples using Bray-Curtis (50) dissimilarities on Hellinger-transformed relative abundances  
339 (51), which we represented using NMDS ordinations. We tested for significant effects of soil  
340 site, days of incubation, amendment, and interactions between soil and day, and soil and  
341 amendment using a permutational multivariate ANOVA (PERMANOVA; the adonis function in  
342 vegan (52). We identified OTUs that were differentially abundant (significantly enriched in  
343 amended soils as compared to control soils) within each soil type and amendment, testing only  
344 taxa that represented at least 0.01% of the mean total community for that soil using the R  
345 package corncob (53). We analyzed the two later timepoints together, while controlling for  
346 timepoint and controlling for differential variance, using a Wald test and correcting p values to  
347 yield a false discovery rate of less than 0.05 within each soil type and amendment.

348

#### 349 *Data availability*

350

351 Sequencing data are available in the NCBI SRA under accession numbers XXX. Code used to  
352 analyze data and generate figures in this paper is available at  
353 [github.com/TheaWhitman/NEON\\_PyOM](https://github.com/TheaWhitman/NEON_PyOM).

354

## 355 **Results**

356

357 nSOC-derived CO<sub>2</sub> emissions were greatest in the soils with the most total SOC (the Hydrudand  
358 and Cryaquept) and lowest in the soils with less total SOC (the Haplocalcid, Fragiudept, and  
359 Quartzipsamment) (Figure 1). PyOM additions increased cumulative nSOC-derived CO<sub>2</sub>  
360 emissions by 55% for the Quartzipsamment soil (FL) only, while OM additions increased  
361 cumulative nSOC-derived CO<sub>2</sub> emissions by 44% for the Haplocalcid (UT), by 126% for the  
362 Fragiudept (NY), and by 170% for the Quartzipsamment (FL) soils (Figures 1 and 2). These  
363 effects were generally largest earlier in the incubation periods, although the significant effects  
364 persisted throughout the full 26 days for the Quartzipsamment.

365

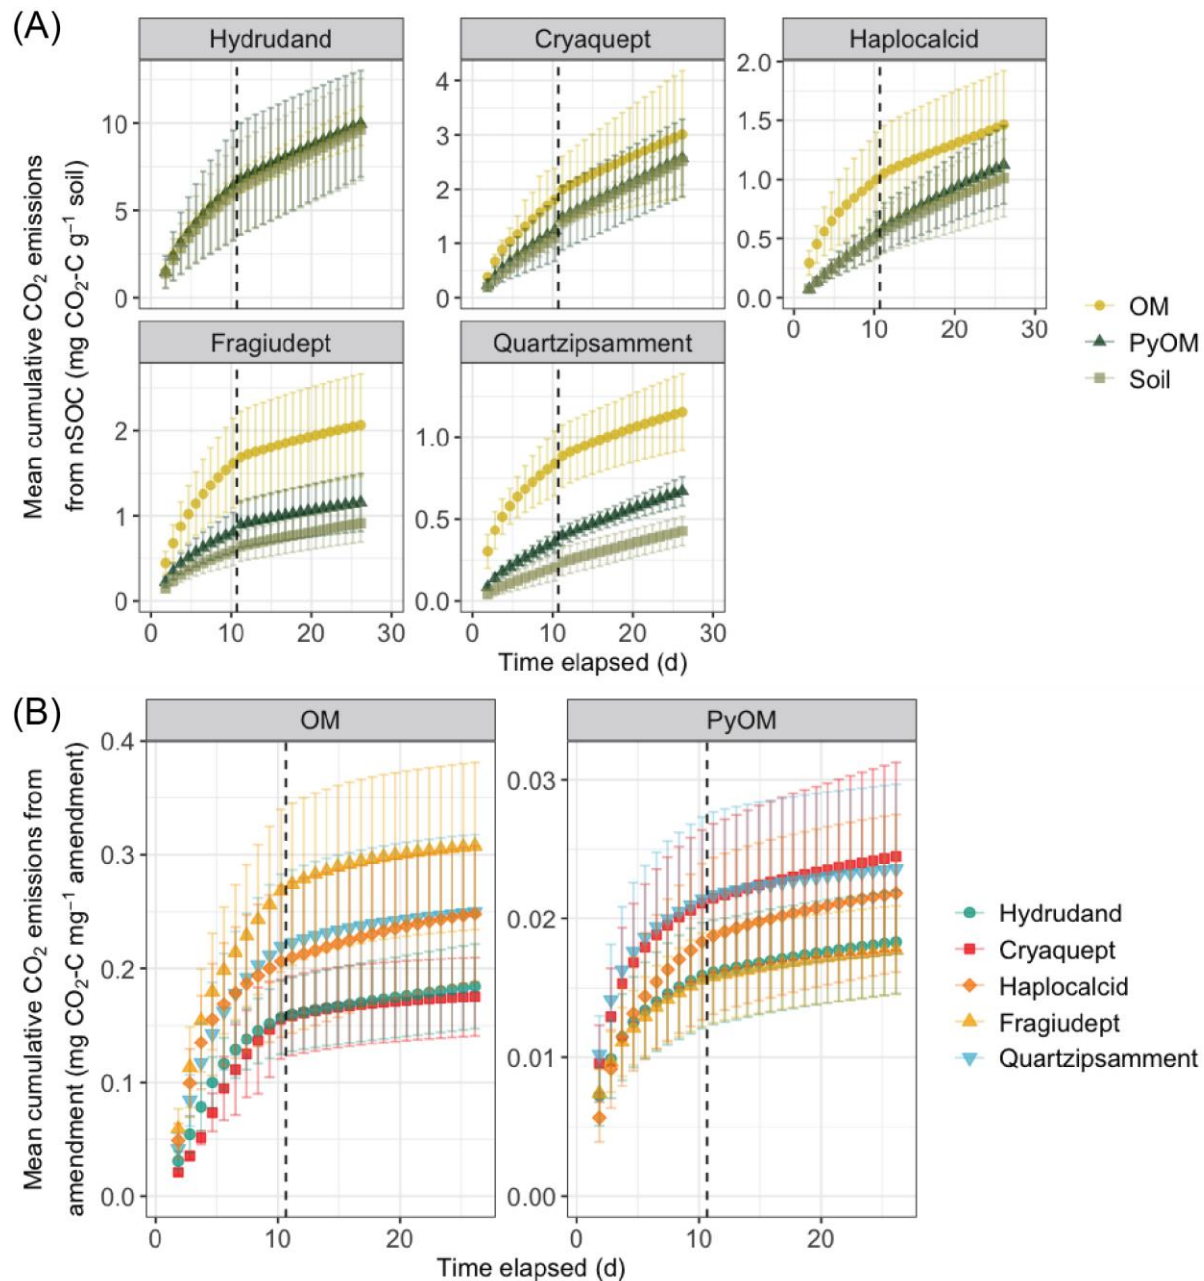

366  
 367 Figure 1. (a) Mean cumulative nSOC-derived CO<sub>2</sub> emissions over time for each soil, with  
 368 organic matter (OM; yellow circles) additions, pyrogenic organic matter (PyOM; dark green  
 369 triangles) additions, or no additions (Soil; pale green squares). Error bars represent  $\pm 1.96SE$   
 370 (95% confidence interval). Dashed line indicates sampling point for mid-incubation harvests.  
 371  $N=4$ . Note different scales on the y-axes. (b) Mean cumulative amendment-derived CO<sub>2</sub>  
 372 emissions over time. Error bars represent  $\pm 1.96SE$  (95% confidence interval). Dashed line  
 373 indicates sampling point for mid-incubation harvests.  $N=4$ . Note different scales on the y-axes.  
 374

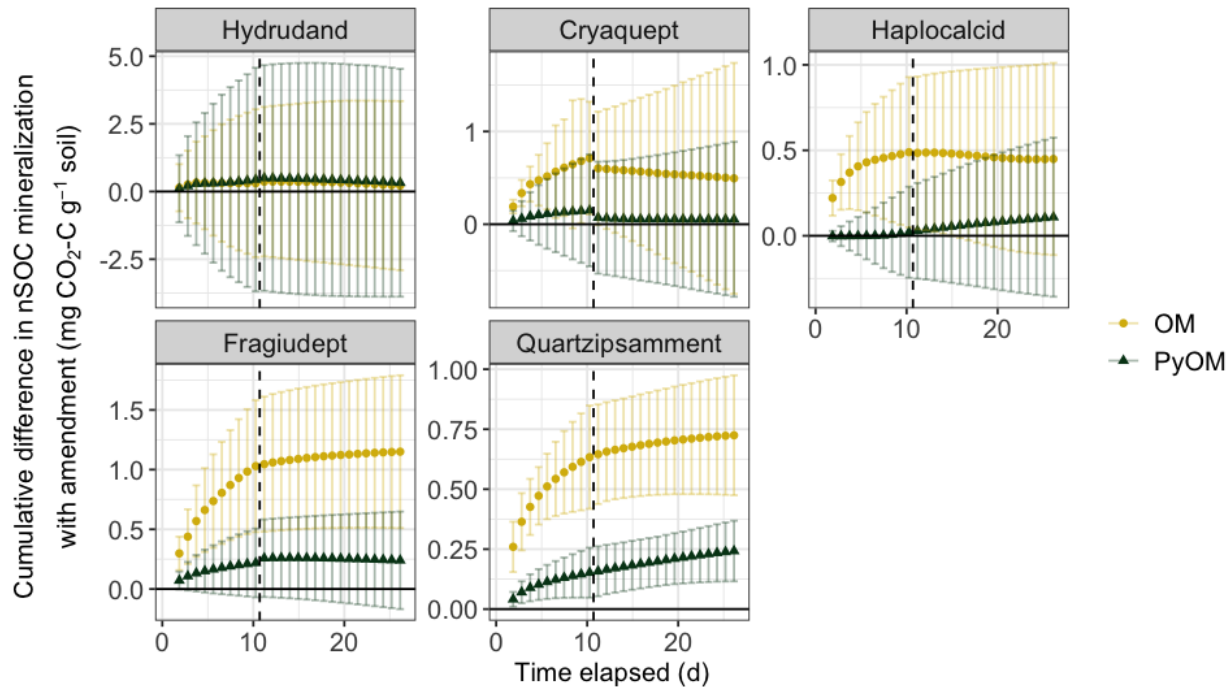

375  
376 Figure 2. Mean cumulative difference in nSOC-derived CO<sub>2</sub> emissions in amended soils as  
377 compared to unamended soil over time for each soil, with organic matter (OM, red circles)  
378 additions and pyrogenic organic matter (PyOM, orange triangles) additions. Error bars represent  
379  $\pm 1.96SE$  (95% confidence interval). Dashed line indicates sampling point for mid-incubation  
380 harvests. N=4. Note different scales on the y-axis.

381  
382 For the full dataset, bacterial community composition was significantly affected by soil site, days  
383 of incubation, amendment, and interactions between soil site and day, and soil site and  
384 amendment (PERMANOVA,  $p < 0.001$  for all effects; Supplementary Table S5; Supplemental  
385 Figure S1). When the soils were analyzed individually (Figure 3A), days of incubation and  
386 amendment were all significant predictors of bacterial community composition (PERMANOVA,  
387  $p < 0.02$ ), except for the Hydrudand, where only days of incubation were significant  
388 (Supplementary Table S6). The effects of amendments were least pronounced in the Hydrudand  
389 from Hawaii and the Cryaquept from Alaska, and most pronounced for the Quartzipsamment  
390 from Florida (Supplementary Table S6).

391  
392 For the full dataset, fungal community composition was significantly affected by soil type/site,  
393 days of incubation, amendment, and interactions between soil and day, and soil and amendment  
394 (PERMANOVA,  $p < 0.001$  for all effects; Supplementary Table S7; Supplemental Figure S2).  
395 When the soils were analyzed individually (Figure 3B), amendment was a significant predictor



396 of fungal community composition for all soils except the Cryaquept (PERMANOVA,  $p < 0.007$ ),  
397 and days of incubation were significant for the Hydrudand, Cryaquept, and Fragiudept  
398 (PERMANOVA,  $p < 0.03$ ) (Supplementary Table S8). The effects of amendments were most  
399 pronounced in the Fragiudept from New York (Supplementary Table S8).

400  
401

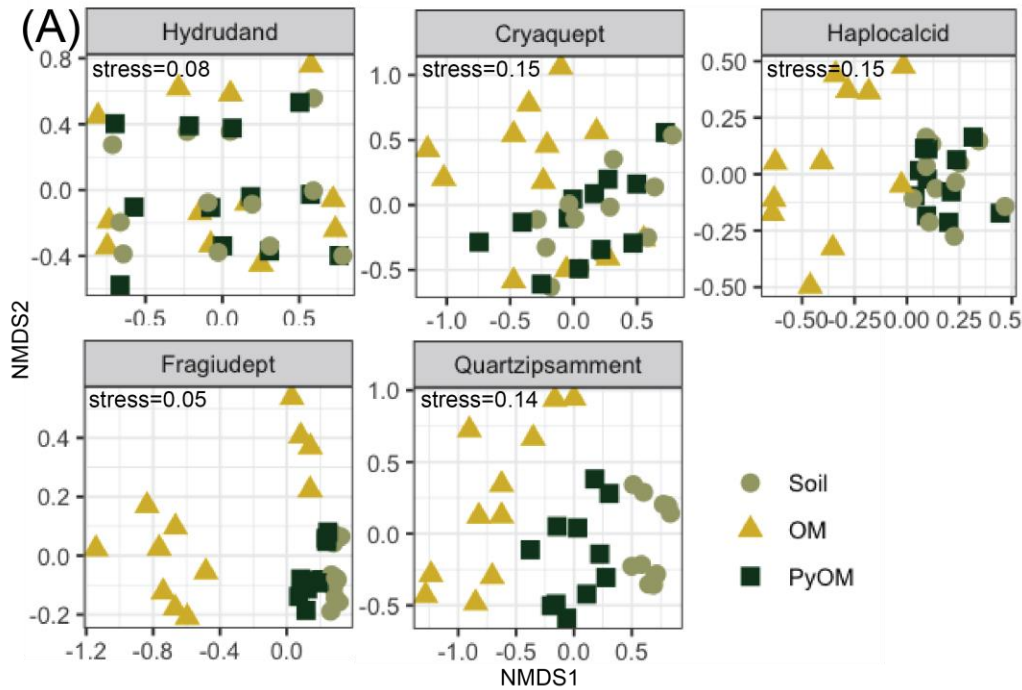

402

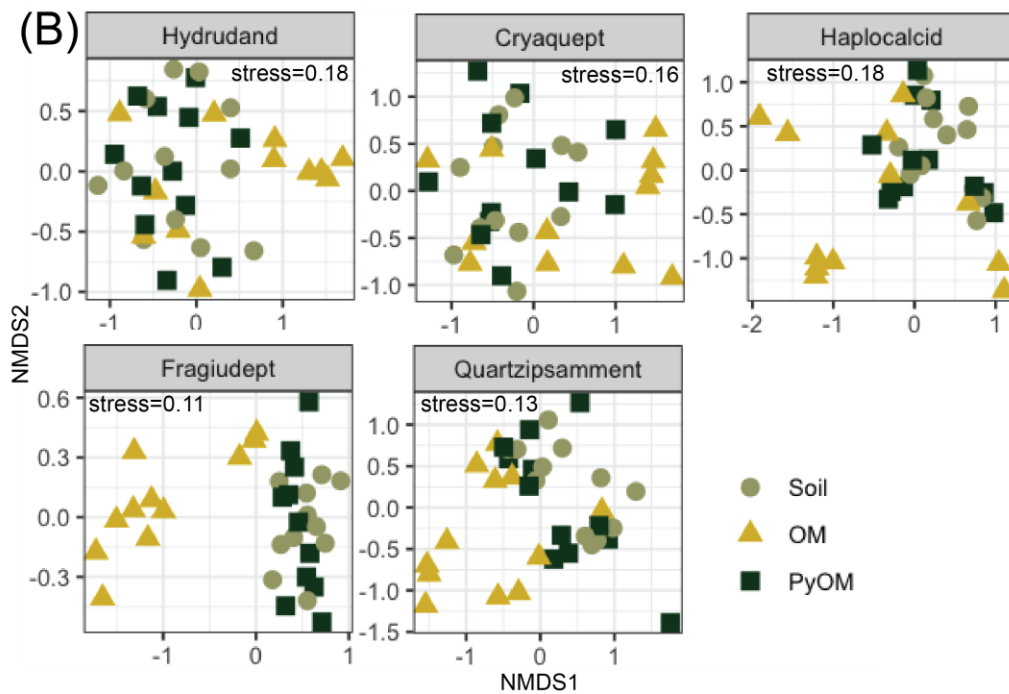

403

404 Figure 3. Non-metric multidimensional scaling plot of Bray-Curtis distances between soil  
 405 microbial communities (Hellinger-transformed relative abundances) at all three timepoints (not  
 406 distinguished on figure) for each soil. Shapes indicate whether organic matter (OM, yellow  
 407 triangles), pyrogenic organic matter (PyOM, dark green squares), or nothing was added (Soil,  
 408 light green circles). (A) Bacteria and Archaea (16S)  $k=2$ ,  $\text{stress}_{\text{Hydrudand}}=0.08$ ,  $\text{stress}_{\text{Cryaquept}}=0.15$ ,  
 409  $\text{stress}_{\text{Haplocalcid}}=0.15$ ,  $\text{stress}_{\text{Fragiudept}}=0.05$ ,  $\text{stress}_{\text{Quartzipsamment}}=0.14$ .  $N=4$  for each timepoint, except  
 410 Haplocalcid on day 10 and Quartzipsamment on day 26, where  $N=3$ ; ordinations were performed  
 411 individually for each soil type. (B) Fungi (ITS2)  $k=2$ ,  $\text{stress}_{\text{Hydrudand}}=0.18$ ,  $\text{stress}_{\text{Cryaquept}}=0.16$ ,  
 412  $\text{stress}_{\text{Haplocalcid}}=0.18$ ,  $\text{stress}_{\text{Fragiudept}}=0.11$ ,  $\text{stress}_{\text{Quartzipsamment}}=0.13$ .  $N=4$  for each timepoint, except  
 413 Fragiudept on day 1, where  $N=3$ ; ordinations were performed individually for each soil type.  
 414  
 415 The greatest changes in soil community composition (highest Bray-Curtis dissimilarity from  
 416 unamended soil) upon amendment with PyOM or OM were associated with the greatest  
 417 increases in nSOC-derived  $\text{CO}_2$  emissions (Figure 4).  
 418

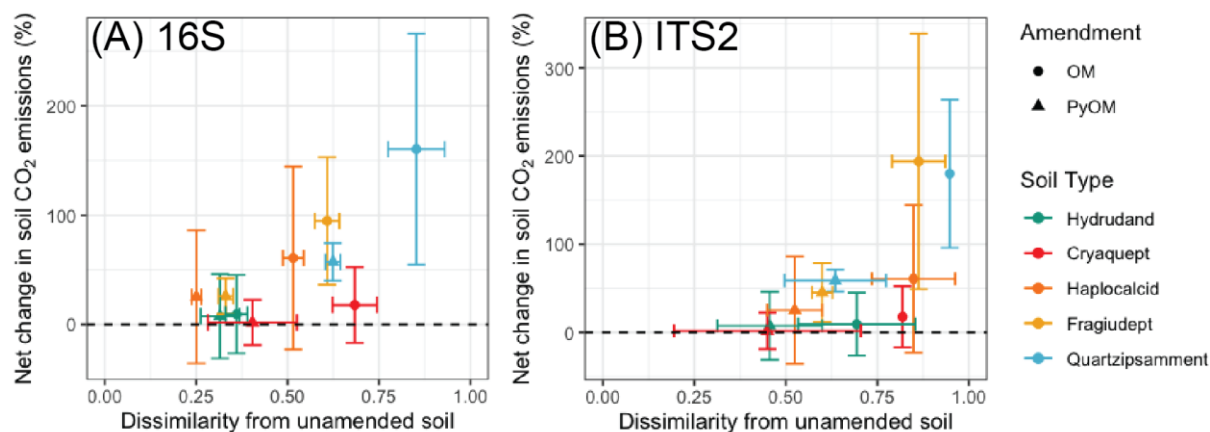

419  
 420 Figure 4. Net change in soil-derived  $\text{CO}_2$  emissions (%) vs. Bray-Curtis dissimilarity on  
 421 Hellinger-transformed abundances from unamended soil for different soils and amendments at  
 422 final timepoint (day 26). Circles represent samples amended with OM and triangles represent  
 423 samples amended with PyOM. Error bars represent  $\pm 1.96\text{SE}$  (95% confidence interval). (A)  
 424 Bacteria and Archaea (16S);  $N=4$ , except Quartzipsamment, where  $N=3$ . (B) Fungi (ITS2);  $N=4$ .  
 425

426 Across all soils, we identified 258 16S OTUs that responded positively to OM amendments, and  
 427 162 OTUs that responded positively to PyOM amendments (Figure 5; Supplemental Table S9).  
 428 Of these OTUs, 77 were responders to PyOM in at least one soil and to OM in at least one soil,  
 429 or “common positive responders”. Genera with common positive responders in multiple soils  
 430 included *Chthoniobacter* (9 OM-responsive OTUs across 3 soils and 5 PyOM-responsive OTUs  
 431 across 2 soils), *Flavisolibacter* (3 OM-responsive OTUs in 1 soil and 3 PyOM-responsive OTUs  
 432 across 2 soils), *Bacillus* (29 OM-responsive OTUs across all 5 soils and 6 PyOM-responsive  
 433 OTUs across 2 soils), *Ammoniphilus* (3 OM-responsive OTUs across 2 soils and 2 PyOM-

434 responsive OTUs across 2 soils), *Gemmatimonas* (3 OM-responsive OTUs across 2 soils and 6  
435 PyOM-responsive OTUs across 3 soils), *Gemmata* (2 OM-responsive OTUs across 2 soils and 2  
436 PyOM-responsive OTUs across 2 soils), *Anaeromyxobacter* (2 OM-responsive OTUs across 2  
437 soils and 3 PyOM-responsive OTUs across 3 soils), *Microvirga* (18 OM-responsive OTUs across  
438 3 soils and 8 PyOM-responsive OTUs across 3 soils), *Achromobacter* (1 OM-responsive OTUs  
439 and 2 PyOM-responsive OTUs across 2 soils), *Noviherbaspirillum* (8 OM-responsive OTUs  
440 across 3 soils and 5 PyOM-responsive OTUs across 2 soils), *Allorhizobium-Neorhizobium-*  
441 *Pararhizobium-Rhizobium* (1 OM-responsive OTU and 2 PyOM-responsive OTUs across 2  
442 soils), and *Haliangium* (1 OM-responsive OTU and 2 PyOM-responsive OTUs across 2 soils).  
443 Only one fungal OTU – a *Spizellomyces* from the *Chytridiomycota* phylum – was identified as  
444 being a significant positive responder to PyOM (estimated  $\log_2$ -fold change of 6.3 in the  
445 Fragiudept), and no fungi were positive responders to OM over the timeframe of this study  
446 (Supplemental Table S10).  
447

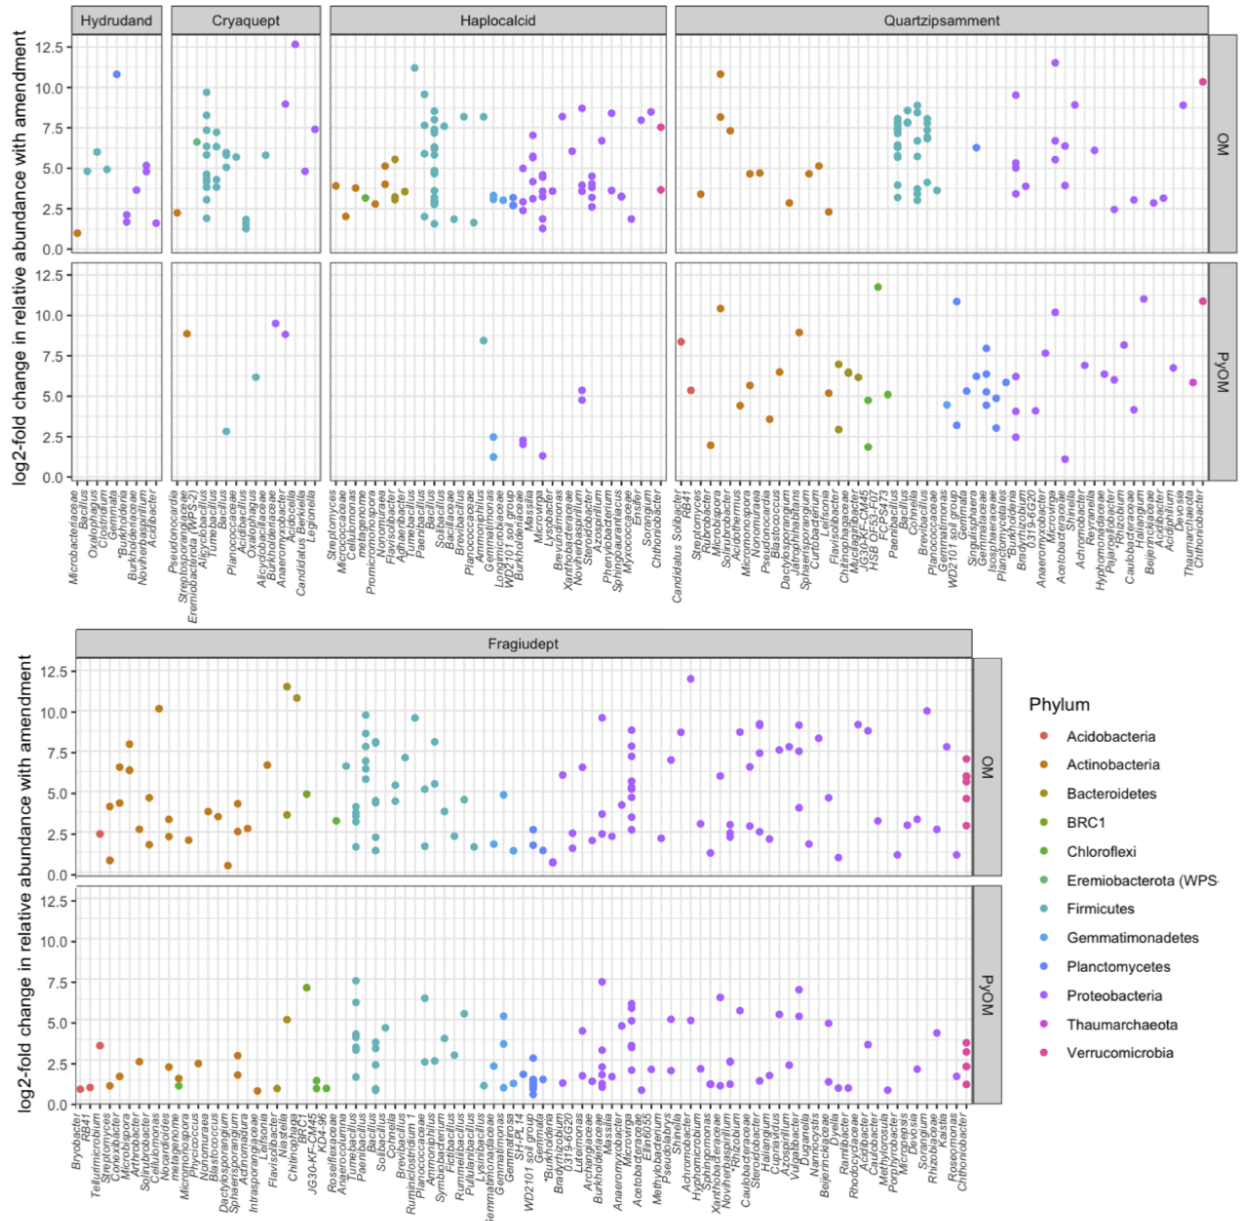

448  
 449 Figure 5. Differential abundance of bacterial and archaeal OTUs that are positive responders to  
 450 OM or PyOM additions, as estimated using the “corncob” algorithm (53) and grouped by soil  
 451 and finest taxonomic resolution available. Each point represents a single OTU. \*Rhizobium label  
 452 represents “Allorhizobium-Neorhizobium-Pararhizobium-Rhizobium” and \*Burkholderia label  
 453 represents “Burkholderia-Caballeronia-Paraburkholderia”.

454  
 455 With a few exceptions, bacterial taxa that responded positively or negatively to PyOM tended to  
 456 also respond similarly to OM (Figure 6).

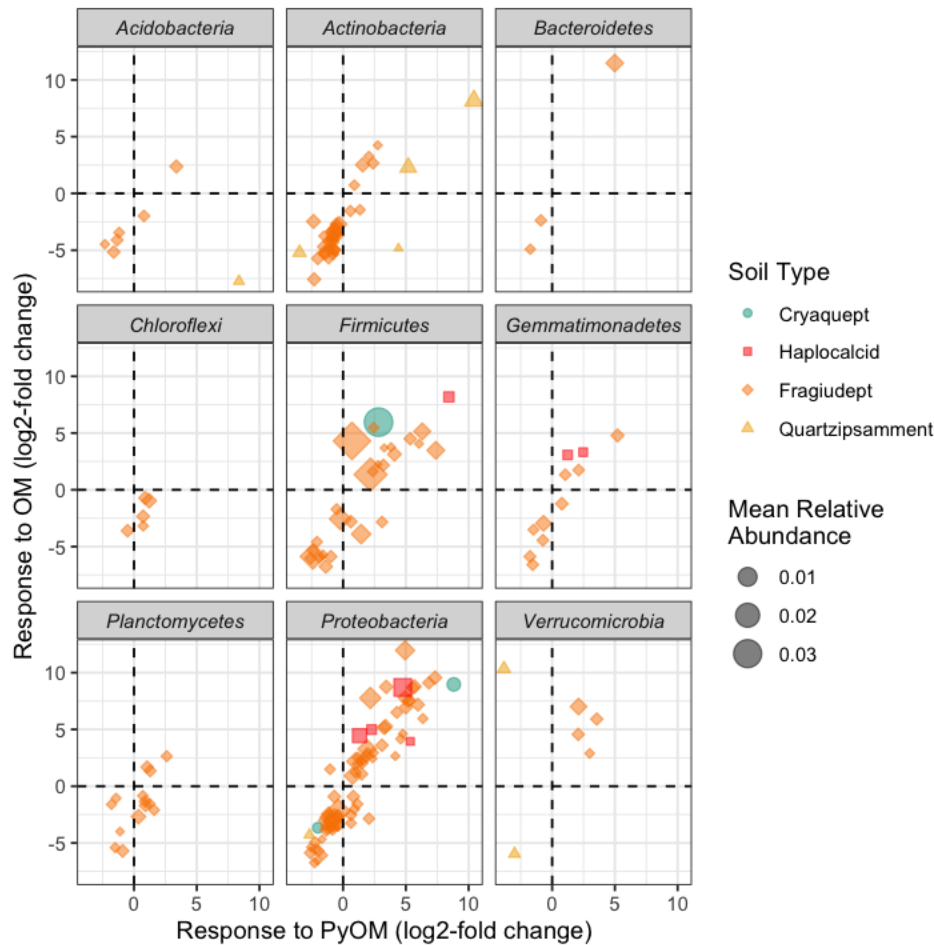

457  
458 Figure 6. Response to PyOM vs. response to OM for bacterial OTUs that were present at a mean  
459 of at least 0.01% and for which there were sufficient observations to perform statistical testing in  
460 both OM- and PyOM-amended samples, as estimated using the “corncob” algorithm (53). Each  
461 point represents a single OTU from one soil, with color and shape indicating soil source, and size  
462 scaled by mean relative abundance within a soil, across all treatments, on days 10 and 26.  
463 Dashed lines indicate 0, or no change in relative abundance as compared to unamended soil.  
464

## 465 Discussion

466

### 467 *Effects of organic amendments on nSOC-derived CO<sub>2</sub> reflect baseline soil C status*

468 In response to our first question, our findings were consistent with our primary hypothesis: soils  
469 with lower baseline CO<sub>2</sub> emissions experienced greater increases in nSOC mineralization with  
470 additions of OM or PyOM (Figures 1 and 2). Simultaneously, increases in nSOC mineralization  
471 were greater with additions of OM than PyOM. These results are consistent with the idea that the  
472 activity of such microbial communities are more likely to be limited by C availability, such that  
473 the addition of PyOM could alleviate this constraint, resulting in general increased microbial

474 activity, and, thus, increased SOC mineralization. In particular, the already low-C  
475 Quartzipsamment from Florida was especially vulnerable to increased nSOC losses with  
476 amendments. Although the Haplocalcid and Fragiudept soils also tended toward increased nSOC  
477 losses with the addition of PyOM, the Quartzipsamment was the only soil for which this effect  
478 was statistically significant for PyOM additions. These findings are consistent with previous  
479 studies across a range of soils and SOC contents (19-22). However, it is important to note that  
480 numerous other mechanisms could also contribute meaningfully to increased nSOC  
481 mineralization with organic amendments, as observed in other systems (17, 19, 20) and described  
482 in the introduction. However, we do not believe the effects we observed were primarily driven  
483 by pH shifts: the pH of four of the five soils were very similar (5.0-5.2). Additionally, we do not  
484 believe the effects were driven primarily by effects of the amendments on moisture: we adjusted  
485 moisture individually for each treatment. We do not believe that the effects were driven  
486 primarily by alleviation of a nutrient constraint with the addition of PyOM: the PyOM had  
487 relatively low N, and, furthermore, previous studies have often shown that soil CO<sub>2</sub> emissions  
488 are inhibited by mineral N additions (54). Additionally, although the strongly-responding  
489 Quartzipsamment had the lowest measured mineral nutrients (Ca, Mg, and K; Table 1), the  
490 highest/second-highest nutrient soil was the Fragiudept, and it had the next strongest CO<sub>2</sub>  
491 response to PyOM and OM amendments, suggesting that nutrient alleviation with PyOM or OM  
492 additions was not the dominant mechanism driving our observed effects.

493

494 On the one hand, the fact that the amendments had the least effect on the high-C soils suggests  
495 that, overall, the effects of increased nSOC mineralization with PyOM amendments might be  
496 less concerning, since the highest-C soils are less responsive. On the other hand, one might  
497 interpret it as being more concerning, since soils with the lowest SOC and lowest microbial  
498 activity to begin with, are most at risk for increased nSOC losses with PyOM amendments. This  
499 raises the question of which soils would be the best candidates for OM or PyOM additions.  
500 High-C soils seem to be lower risks for short-term increased CO<sub>2</sub> emissions. However, other  
501 benefits to low-C soils, such as changes to water holding capacity, or total SOC content (PyOM-  
502 C + SOC), might outweigh this trade-off.

503



504 Even though our results strongly support the finding that short-term increases in CO<sub>2</sub> emissions  
505 are most likely in soils with low C and/or low mineralization rates to begin with, it is important  
506 to note that these effects were observed over the *short term* – *i.e.*, over just a few weeks. As in  
507 other studies, the time period during which amendments increased net nSOC-derived CO<sub>2</sub>  
508 emissions, the net increase usually began to level off, or even begin to decrease. Given this  
509 observation, and since other studies have observed net negative effects of PyOM amendments  
510 over longer time periods (16, 17), the findings from this study should be considered primarily  
511 within the context of short-term response to amendments.

512

513 *Magnitude of microbial community composition change mirrors magnitude of increases in*  
514 *nSOC-CO<sub>2</sub>*

515 In response to our second question, our findings were also consistent with our primary  
516 hypothesis: we found that the degree to which soil microbial communities change with PyOM or  
517 OM amendments reflected the degree to which nSOC mineralization also increased (Figure 4).  
518 This supports the idea that the taxa that respond positively to PyOM and especially OM additions  
519 may also be the same taxa that are responsible for increased nSOC mineralization with PyOM or  
520 OM additions. Thus, a stronger shift toward these groups is accompanied by a stronger effect on  
521 nSOC mineralization. That said, it is important to note that, because we did not directly trace the  
522 fate of the organic substances into taxon-specific microbial biomass (*e.g.*, using an approach  
523 such as stable isotope probing), we have not conclusively demonstrated that the microbes that  
524 increased in abundance with additions were also the ones that metabolized the greater amount of  
525 nSOC. Still, it is not unreasonable to expect that increased total abundances of specific bacterial  
526 taxa might be accompanied by their increased activity as well. Overall, OM additions resulted in  
527 both a larger change in community composition, and also a larger increase in nSOC  
528 mineralization than did PyOM additions.

529

530 *PyOM responders differ across soils and do not reflect a common “charosphere”*

531 Although PyOM additions did have a significant effect on microbial community composition,  
532 PyOM-induced changes in community composition were much smaller than the differences in  
533 community composition between different soils (Figure 3; Supplemental Tables S5 and S7;  
534 Supplemental Figures S1 and S2). Thus, PyOM did not result in a community dominated by the

535 “charosphere” (33, 34), but, rather, resulted in detectable but relatively subtle shifts within a few  
536 of the existing taxa (Figures 5 and 6). We made a similar observation in our recent cross-study  
537 comparison of the effects of PyOM additions on soil bacterial community composition (27). This  
538 current study substantially improves our confidence in that observation, since it is not  
539 constrained by the challenges of cross-study differences in methods and materials and spans five  
540 different soils. Together, these observations underscore the importance of considering the effects  
541 of PyOM within the unique context of a given soil, rather than generalizing the effects of PyOM  
542 on soil microbial communities across all soils.

543  
544 We were also interested in the specific taxa that responded to PyOM additions. In a previous  
545 field trial with the same Fragiudept soil and similar amendments (25), we identified a number of  
546 “common responders” to PyOM and OM after 82 days in the field. We suggested that those taxa  
547 may be most likely responsible for the short-term C mineralization effects of PyOM additions,  
548 and predicted that we would observe a similar phenomenon in the current study, possibly even  
549 across soils. This general trend persisted (Figure 6), in that OTUs that responded (positively or  
550 negatively) to one amendment tended to respond similarly to the other. Although there are a few  
551 taxa that are exceptions to this (respond positively to one amendment but negatively to the  
552 other), we hesitate to dwell too much on this response, since they tend to be low-abundance taxa  
553 to begin with. Because the same taxa that respond to PyOM over the short term also responded  
554 positively to OM, we suggest that this supports the idea that PyOM-responsive taxa in this study  
555 were likely responding to the small fraction of easily-mineralizable PyOM-C, and supporting the  
556 idea that a responsive fraction of the overall community might be responsible for short term  
557 increases in nSOC mineralization with PyOM amendments. Over longer timescales, we might  
558 expect different results as other mechanisms emerge. However, we were not necessarily able to  
559 identify a “core set” or PyOM responders across different soils. This is likely due in part to the  
560 small response overall to PyOM in the higher-C soils, and also to the diversity of organisms  
561 between soils. While there were 162 different PyOM-responsive OTUs, the same OTUs were  
562 often not present in the different soils: 62% of all 16S OTUs were detected (regardless of  
563 abundance) in only a single unamended soil (97% for ITS2), and 26% of all 16S OTUS were  
564 detected in only two different soils (2% for ITS2). In particular, since we used the dada2 OTU-  
565 picking algorithm, which can differentiate OTUs that differ by a single base pair, or “amplicon

566 sequence variants”, it may be useful to consider common responders at a coarser phylogenetic  
567 scale. If we consider the OTUs at the genus level, there were numerous bacterial genera with  
568 OTUs that were responsive to PyOM in multiple soils, as well as OM amendments, as described  
569 in the results section. Some of the genera with PyOM-responsive OTUs across more than one  
570 soil were also identified as having PyOM-responsive OTUs in multiple studies in our previous  
571 meta-analysis, including *Flavisolibacter*, *Microvirga*, and *Noviherbaspirillum* (27).  
572 Additionally, some of these PyOM-responsive bacteria are from genera that have been identified  
573 as being fire-responsive in other studies (e.g., *Microvirga* (55), *Bacillus* (56), and  
574 *Noviherbaspirillum* (57)). Because all of the named taxa were also responsive to OM  
575 amendments over the short term, we raise the question of whether these OTUs may be  
576 responding to the more easily-mineralizable fractions of PyOM, or, in the case of fires, also to  
577 fire-released OM. Together, these taxa could represent interesting candidates for future  
578 investigation of the ecology of fire- and PyOM-responsive bacteria.

579

## 580 **Conclusions**

581

582 While our short-term incubation indicates that low-C soils might be at the greatest risk for short-  
583 term C losses with OM or PyOM amendments, we note that the losses were greater with OM  
584 than with PyOM additions, and that many studies have shown that these short-term effects are  
585 relatively limited, and often even become net C increases over longer timescales. Together, our  
586 findings indicate that changes in microbial community composition mirrored changes in nSOC  
587 mineralization. This suggests that it may be likely that the change in CO<sub>2</sub> emissions with the  
588 addition of amendments is governed by a specific subset of the microbial community, rather than  
589 a general stimulation of the entire community. Although these specific responsive organisms  
590 were not consistent across all soils, and depend on the native microbial community, certain taxa  
591 were identified as common responders. Future research could utilize techniques such as stable  
592 isotope probing to conclusively demonstrate which microbes are using the amendments as a C  
593 source, and to expand the research to more soil types, different timescales, and different PyOM  
594 materials to begin to develop a more comprehensive understanding of the specific microbial  
595 responders. It would also be interesting to determine whether or when our observation does not  
596 hold – whether there are conditions under which large community changes in response to organic

597 amendments are not accompanied by changes in nSOC-CO<sub>2</sub> emissions, and, conversely, whether  
598 there are conditions where large changes in CO<sub>2</sub> emissions are observed, but not accompanied by  
599 changes in microbial community composition.

600

#### 601 **Author Contribution Statement**

602

603 T.W. and J.L. were responsible for the experimental design. T.W., S.D., K.H., A.E., and J.L.  
604 developed and optimized the experimental conditions. S.D., K.H., and A.E. set up and ran the in-  
605 lab experiment. T.W. and J.W. performed the DNA extractions, sequencing, and microbial  
606 bioinformatics. T.W. analyzed the data and T.W. and J.L. interpreted the data. T.W. drafted the  
607 manuscript and all authors contributed to, read, and approved the manuscript.

608

#### 609 **Acknowledgements**

610 We thank Dominic Woolf, who was instrumental in helping develop the original R script that  
611 was modified to analyze these data. The National Ecological Observatory Network is a program  
612 sponsored by the National Science Foundation and operated under cooperative agreement by  
613 Battelle Memorial Institute. This material is based in part upon work supported by the National  
614 Science Foundation through the NEON Program. We thank the NEON project, including Dave  
615 Tazik, Lee Stanish, and Samantha Weintraub for helping us access the NEON soils. We also  
616 would like to acknowledge the following individuals and organizations for providing soils for an  
617 initial planned version of the experiment which were, unfortunately, ultimately lost when a  
618 freezer broke down: John Anderson and Bernice Gamboa and the Jornada Experimental Range;  
619 William J. McShea and the Smithsonian Conservation Biology Institute; Mitch McClaran and  
620 the Santa Rita Experimental Range; Petra Royston, Ben Gottloeb, and Robert Nelson and the  
621 Disney Wilderness Preserve; Audrey Barker-Plotkin and the Harvard Forest; Stephen Coates and  
622 the Ordway Swisher Biological Station; Isabel Ashton, Tracey Baldwin and Craig Emerson and  
623 the Rocky Mountain National Park, Central Plains Experimental Range, and the North Sterling  
624 NEON sites; Holly Johnson, Matt Sanderson, and Mark Liebzig and the Northern Great Plains  
625 Research Lab; Ty Lindberg at NEON; all others who helped collect and ship those soils. An NSF  
626 Doctoral Dissertation Improvement Grant award to T.W. and J.L. supported the bulk of this

627 research [NSF-1406195]; U.S. Department of Energy also helped support T.W. [DE-  
628 SC0016365].

629

### 630 **Supplementary Information**

631 Supplementary information is available at X.

632

### 633 **References**

634

- 635 1. Ciais P, Sabine C, Bala G, Bopp L, Brovkin V, Canadell J, Chhabra A, DeFries R, Galloway  
636 J, Heimann M, Jones C, Le Quéré C, Myneni RB, Piao S, Thornton P. 2013. Carbon and  
637 other biogeochemical cycles, pp. 465–570. *In* Stocker, TF, Quin, D, Plattner, GK, Tignor,  
638 M, Allen, SK, Boschung, J, Nauels, A, Xia, Y, Bex, V, Midgley, PM, P (eds.), *Climate*  
639 *Change - The Physical Science Basis. Contribution of Working Group I to the Fifth*  
640 *Assessment Report of the Intergovernmental Panel on Climate Change.* Cambridge Univ  
641 Press, Cambridge, UK.
- 642 2. Schmidt MWI, Torn MS, Abiven S, Dittmar T, Guggenberger G, Janssens IA, Kleber M,  
643 Kögel-Knabner I, Lehmann J, Manning DAC, Nannipieri P, Rasse DP, Weiner S, Trumbore  
644 SE. 2011. Persistence of soil organic matter as an ecosystem property. *Nature* 478:49–56.
- 645 3. Zimmerman AR, Mitra S. 2017. Trial by Fire: On the Terminology and Methods Used in  
646 Pyrogenic Organic Carbon Research. *Frontiers in Earth Science* 5:354.
- 647 4. Jones MW, Santín C, Van Der Werf GR, Doerr SH. 2019. Global fire emissions buffered by  
648 the production of pyrogenic carbon. *Nature Geoscience*, 12:742-747.
- 649 5. Reisser M, Purves RS, Schmidt MWI, Abiven S. 2016. Pyrogenic Carbon in Soils: A  
650 Literature-Based Inventory and a Global Estimation of Its Content in Soil Organic Carbon  
651 and Stocks. *Frontiers in Earth Science*, 4:80.
- 652 6. Lehmann J. 2007. A handful of carbon. *Nature* 447:143–144.
- 653 7. Laird DA. 2008. The charcoal vision: A win–win–win scenario for simultaneously  
654 producing bioenergy, permanently sequestering carbon, while improving soil and water  
655 quality. *Agronomy Journal* 100:178–181.
- 656 8. Wardle DA, Nilsson MC, Zackrisson O. 2008. Fire-Derived Charcoal Causes Loss of Forest  
657 Humus. *Science* 320:629–629.
- 658 9. Wardle DA, Nilsson MC, Zackrisson O. 2008. Response to Comment on “Fire-Derived  
659 Charcoal Causes Loss of Forest Humus.” *Science* 321:1295d–1295d.
- 660 10. Lehmann J, Sohi S. 2008. Comment on “Fire-Derived Charcoal Causes Loss of Forest  
661 Humus.” *Science* 321:1295c–1295c.

- 662 11. Zimmerman AR, Bin Gao, Ahn M-Y. 2011. Positive and negative carbon mineralization  
663 priming effects among a variety of biochar-amended soils. *Soil Biology and Biochemistry*  
664 43:1169–1179.
- 665 12. Kuzyakov Y, Subbotina I, Chen H, Bogomolova I, Xu X. 2009. Black carbon decomposition  
666 and incorporation into soil microbial biomass estimated by <sup>14</sup>C labeling. *Soil Biology and*  
667 *Biochemistry* 41:210–219.
- 668 13. Luo Y, Durenkamp M, De Nobili M, Lin Q, Brookes PC. 2011. Short term soil priming  
669 effects and the mineralisation of biochar following its incorporation to soils of different pH.  
670 *Soil Biology and Biochemistry* 43:2304–2314.
- 671 14. Bingeman CW, Varner JE, Martin WP. 1953. The effect of the addition of organic materials  
672 on the decomposition of an organic soil. *Soil Science Society of America Journal* 17:34–38.
- 673 15. Blagodatskaya E, Kuzyakov Y. 2008. Mechanisms of real and apparent priming effects and  
674 their dependence on soil microbial biomass and community structure: critical review.  
675 *Biology and Fertility of Soils* 45:115–131.
- 676 16. Whitman T, Zhu Z, Lehmann J. 2014. Carbon Mineralizability Determines Interactive  
677 Effects on Mineralization of Pyrogenic Organic Matter and Soil Organic Carbon.  
678 *Environmental Science & Technology* 48:13727–13734.
- 679 17. DeCiucies S, Whitman T, Woolf D, Enders A, Lehmann J. 2018. Priming mechanisms with  
680 additions of pyrogenic organic matter to soil. *Geochimica et Cosmochimica Acta* 238:329–  
681 342.
- 682 18. Cheng H, Hill PW, Bastami MS, Jones DL. 2017. Biochar stimulates the decomposition of  
683 simple organic matter and suppresses the decomposition of complex organic matter in a  
684 sandy loam soil. *GCB Bioenergy* 9:1110–1121.
- 685 19. Maestrini B, Nannipieri P, Abiven S. 2014. A meta-analysis on pyrogenic organic matter  
686 induced priming effect. *GCB Bioenergy* 7:577–590.
- 687 20. Whitman T, Singh BP, Zimmerman AR. 2015. Priming effects in biochar-amended soils:  
688 Implications of biochar-soil organic matter interactions for carbon storage, pp. 455–487. *In*  
689 *Lehmann, J, Joseph, S (eds.), Biochar for Environmental Management, 2nd ed. Routledge,*  
690 *New York, NY.*
- 691 21. Wang J, Xiong Z, Kuzyakov Y. 2016. Biochar stability in soil: meta-analysis of  
692 decomposition and priming effects. *GCB Bioenergy* 8:512–523.
- 693 22. Ding F, van Zwieten L, Zhang W, Weng ZH, Shi S, Wang J, Meng J. 2018. A meta-analysis  
694 and critical evaluation of influencing factors on soil carbon priming following biochar  
695 amendment. *Journal of Soils and Sediments* 18:1507–1517.
- 696 23. Woolf D, Lehmann J. 2012. Modelling the long-term response to positive and negative  
697 priming of soil organic carbon by black carbon. *Biogeochemistry* 111:83–95.



- 698 24. Woolf D, Amonette JE, Street-Perrott FA, Lehmann J, Joseph S. 2010. Sustainable biochar  
699 to mitigate global climate change. *Nature Communications* 1:1–9.
- 700 25. Whitman T, Pepe-Rannek C, Enders A, Koechli C, Campbell A, Buckley DH, Lehmann J.  
701 2016. Dynamics of microbial community composition and soil organic carbon  
702 mineralization in soil following addition of pyrogenic and fresh organic matter. *The ISME*  
703 *Journal* 10:2918–2930.
- 704 26. Yu Z, Chen L, Pan S, Li Y, Kuzyakov Y, Xu J, Brookes PC, Luo Y. 2018. Feedstock  
705 determines biochar-induced soil priming effects by stimulating the activity of specific  
706 microorganisms. *European Journal of Soil Science* 69:521–534.
- 707 27. Wooley J, Whitman T. Review: Pyrogenic organic matter effects on soil bacterial community  
708 composition. *Soil Biology and Biochemistry* 141:107678.
- 709 28. Dai Z, Hu J, Xu X, Zhang L, Brookes PC, He Y, Xu J. 2016. Sensitive responders among  
710 bacterial and fungal microbiome to pyrogenic organic matter (biochar) addition differed  
711 greatly between rhizosphere and bulk soils. *Scientific Reports* 1–11.
- 712 29. Nielsen S, Minchin T, Kimber S, van Zwieten L, Gilbert J, Munroe P, Joseph S, Thomas T.  
713 2014. Comparative analysis of the microbial communities in agricultural soil amended with  
714 enhanced biochars or traditional fertilisers. *Agriculture, Ecosystems and Environment*  
715 191:73–82.
- 716 30. Wu H, Zeng G, Liang J, Chen J, Xu J, Dai J, Li X, Chen M, Xu P, Zhou Y, Li F, Hu L, Wan  
717 J. 2016. Responses of bacterial community and functional marker genes of nitrogen cycling  
718 to biochar, compost and combined amendments in soil. *Applied Microbiology and*  
719 *Biotechnology* 100:8583–8591.
- 720 31. Imparato V, Hansen V, Santos SS, Nielsen TK, Giagnoni L, Hauggaard-Nielsen H, Johansen  
721 A, Renella G, Winding A. 2016. Gasification biochar has limited effects on functional and  
722 structural diversity of soil microbial communities in a temperate agroecosystem. *Soil*  
723 *Biology and Biochemistry* 99:128–136.
- 724 32. Yao Q, Liu J, Yu Z, Li Y, Jin J, Liu X, Wang G. 2017. Changes of bacterial community  
725 compositions after three years of biochar application in a black soil of northeast China.  
726 *Applied Soil Ecology* 113:11–21.
- 727 33. Quilliam RS, Glanville HC, Wade SC. 2013. Life in the “charosphere”—Does biochar in  
728 agricultural soil provide a significant habitat for microorganisms? *Soil Biology and*  
729 *Biochemistry* 65:287–293.
- 730 34. Clough TJ, Condon LM. 2010. Biochar and the Nitrogen Cycle: Introduction. *Journal of*  
731 *Environment Quality* 39:1218.
- 732 35. National Ecological Observatory Network. 2016. Soil microbe prototype 16S sequence data,  
733 2009–2010.

- 734 36. Whitman T, Lehmann J. 2015. A dual-isotope approach to allow conclusive partitioning  
735 between three sources. *Nature Communications* 6:8708.
- 736 37. Walters W, Hyde ER, Berg-Lyons D, Ackermann G, Humphrey G, Parada A, Gilbert JA,  
737 Jansson JK, Caporaso JG, Fuhrman JA, Apprill A, Knight R. 2015. Improved Bacterial 16S  
738 rRNA Gene (V4 and V4-5) and Fungal Internal Transcribed Spacer Marker Gene Primers  
739 for Microbial Community Surveys. *mSystems* 1:e00009–15.
- 740 38. Taylor DL, Walters WA, Lennon NJ, Bochicchio J, Krohn A, Caporaso JG, Pennanen T.  
741 2016. Accurate Estimation of Fungal Diversity and Abundance Through Improved Lineage-  
742 Specific Primers Optimized for Illumina Amplicon Sequencing. *Applied and Environmental*  
743 *Microbiology* 82:AEM.02576–16–7226.
- 744 39. Kozich JJ, Westcott SL, Baxter NT, Highlander SK, Schloss PD. 2013. Development of a  
745 Dual-Index Sequencing Strategy and Curation Pipeline for Analyzing Amplicon Sequence  
746 Data on the MiSeq Illumina Sequencing Platform. *Applied and Environmental Microbiology*  
747 79:5112–5120.
- 748 40. Callahan BJ, McMurdie PJ, Rosen MJ, Han AW, Johnson AJA, Holmes SP. 2016. DADA2:  
749 High-resolution sample inference from Illumina amplicon data. *Nature Methods* 13:581–  
750 583.
- 751 41. Wang Q, Garrity GM, Tiedje JM, Cole JR. 2007. Naive Bayesian classifier for rapid  
752 assignment of rRNA sequences into the new bacterial taxonomy. *Applied and*  
753 *Environmental Microbiology* 73:5261–5267.
- 754 42. Quast C, Pruesse E, Yilmaz P, Gerken J, Schweer T, Yarza P, Peplies J, Glöckner FO. 2013.  
755 The SILVA ribosomal RNA gene database project: improved data processing and web-  
756 based tools. *Nucleic Acids Research* 41:D590–D596.
- 757 43. Bolyen E, Rideout JR, Dillon MR, Bokulich NA, Abnet CC, Al-Ghalith GA, Alexander H,  
758 Alm EJ, Arumugam M, Asnicar F, Bai Y, Bisanz JE, Bittinger K, Brejnrod A, Brislawn CJ,  
759 Brown CT, Callahan BJ, Caraballo-Rodríguez AM, Chase J, Cope EK, Da Silva R, Diener  
760 C, Dorrestein PC, Douglas GM, Durall DM, Duvallet C, Edwardson CF, Ernst M, Estaki M,  
761 Fouquier J, Gauglitz JM, Gibbons SM, Gibson DL, Gonzalez A, Gorlick K, Guo J, Hillmann  
762 B, Holmes S, Holste H, Huttenhower C, Huttley GA, Janssen S, Jarmusch AK, Jiang L,  
763 Kaehler BD, Bin Kang K, Keefe CR, Keim P, Kelley ST, Knights D, Koester I, Kosciolk T,  
764 Kreps J, Langille MGI, Lee J, Ley R, Liu Y-X, Loftfield E, Lozupone C, Maher M, Marotz  
765 C, Martin BD, McDonald D, McIver LJ, Melnik AV, Metcalf JL, Morgan SC, Morton JT,  
766 Naimey AT, Navas-Molina JA, Nothias LF, Orchanian SB, Pearson T, Peoples SL, Petras D,  
767 Preuss ML, Pruesse E, Rasmussen LB, Rivers A, Robeson MS, Rosenthal P, Segata N,  
768 Shaffer M, Shiffer A, Sinha R, Song SJ, Spear JR, Swafford AD, Thompson LR, Torres PJ,  
769 Trinh P, Tripathi A, Turnbaugh PJ, Ul-Hasan S, van der Hooft JJJ, Vargas F, Vázquez-  
770 Baeza Y, Vogtmann E, Hippel von M, Walters W, Wan Y, Wang M, Warren J, Weber KC,  
771 Williamson CHD, Willis AD, Xu ZZ, Zaneveld JR, Zhang Y, Zhu Q, Knight R, Caporaso  
772 JG. 2019. Reproducible, interactive, scalable and extensible microbiome data science using  
773 QIIME 2. *Nature Biotechnology* 37:852–857.

- 774 44. Zhang J, Kobert K, Flouri T, Stamatakis A. 2014. PEAR: a fast and accurate Illumina  
775 Paired-End reAd mergeR. *Bioinformatics* 30:614–620.
- 776 45. R Core Team. R: A language and environment for statistical computing. ISBN 3-900051-07-  
777 0. Vienna, Austria.
- 778 46. Balesdent J, Mariotti A. 1996. Measurement of soil organic matter turnover using  $^{13}\text{C}$   
779 natural abundance., pp. 83–111. *In* Boutton, TW, Yamasaki, SI (eds.), *Mass Spectrometry of*  
780 *Soils*.
- 781 47. McMurdie PJ, Holmes S. 2013. phyloseq: An R Package for Reproducible Interactive  
782 Analysis and Graphics of Microbiome Census Data. *PLoS ONE* 8:e61217.
- 783 48. Wickham H. *ggplot2: Elegant Graphics for Data Analysis*. Springer-Verlag New York.
- 784 49. Wickham H, François R, Henry L, Müller K. *dplyr: A Grammar of Data Manipulation*.
- 785 50. Bray JR, Curtis JT. 1957. An Ordination of the Upland Forest Communities of Southern  
786 Wisconsin. *Ecological Monographs* 27:325–349.
- 787 51. Legendre P, Gallagher ED. 2001. Ecologically meaningful transformations for ordination of  
788 species data. *Oecologia* 129:271–280.
- 789 52. Oksanen J, Blanchet FG, Kindt R, Legendre P, Minchin PR, OHara RB, Simpson GL,  
790 Solymos P, Stevens MHH, Wagner H. *vegan: Community Ecology Package*, 2nd ed.
- 791 53. Martin BD. *corncob: Count Regression for Correlated Observations with the Beta-Binomial*.
- 792 54. Ramirez KS, Craine JM, Fierer N. 2012. Consistent effects of nitrogen amendments on soil  
793 microbial communities and processes across biomes. *Global Change Biology* 18:1918–1927.
- 794 55. Fernández-González AJ, Martínez-Hidalgo P, Cobo-Díaz JF, Villadas PJ, Martínez-Molina  
795 E, Toro N, Tringe SG, Fernández-López M. 2017. The rhizosphere microbiome of burned  
796 holm-oak: potential role of the genus *Arthrobacter* in the recovery of burned soils. *Scientific*  
797 *Reports* 7:6008.
- 798 56. Cobo-Díaz JF, Fernández-González AJ, Villadas PJ, Robles AB, Toro N, Fernández-López  
799 M. 2015. Metagenomic Assessment of the Potential Microbial Nitrogen Pathways in the  
800 Rhizosphere of a Mediterranean Forest After a Wildfire. *Microbial Ecology* 69:895–904.
- 801 57. Whitman T, Whitman E, Woollet J, Flannigan MD, Thompson DK, Parisien M-A. 2019. Soil  
802 Bacterial and Fungal Response to Wildfires in the Canadian Boreal Forest Across a Burn  
803 Severity Gradient. *Soil Biology and Biochemistry*, 138:107571.
- 804

(A)

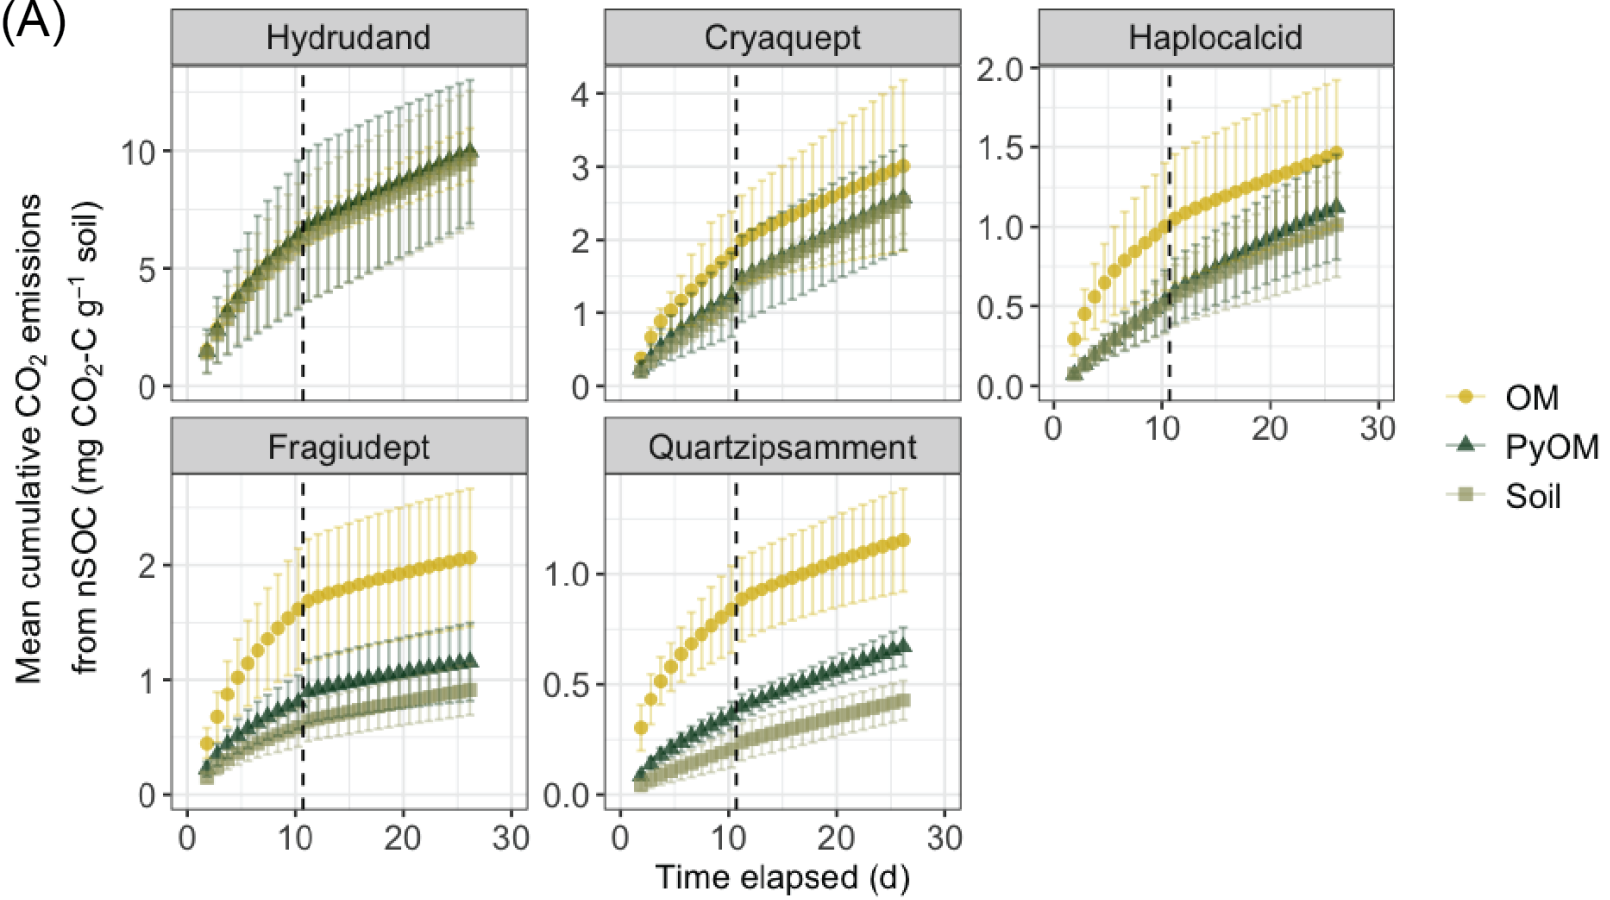

(B)

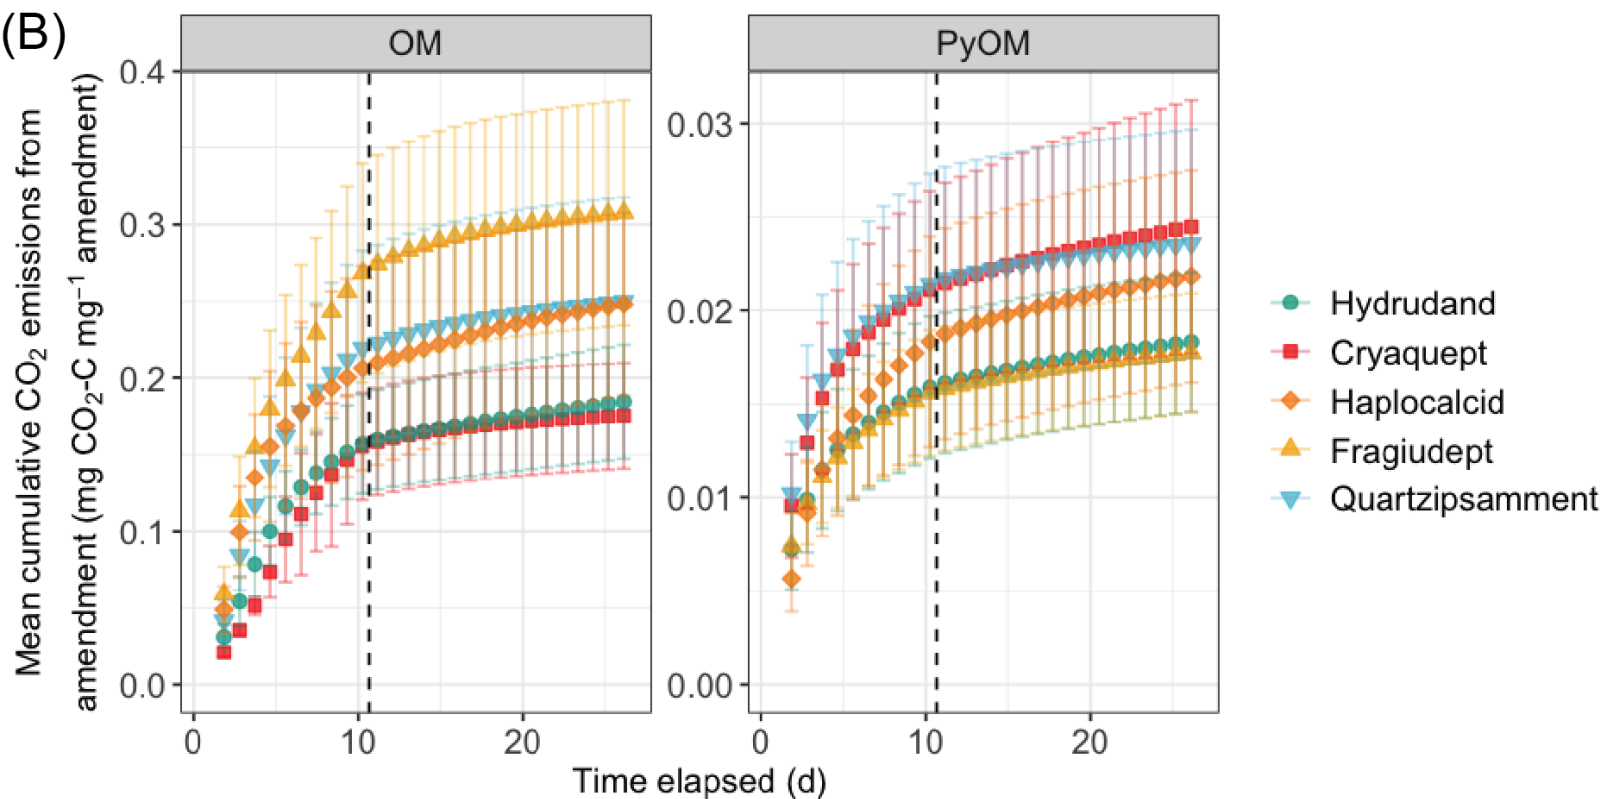

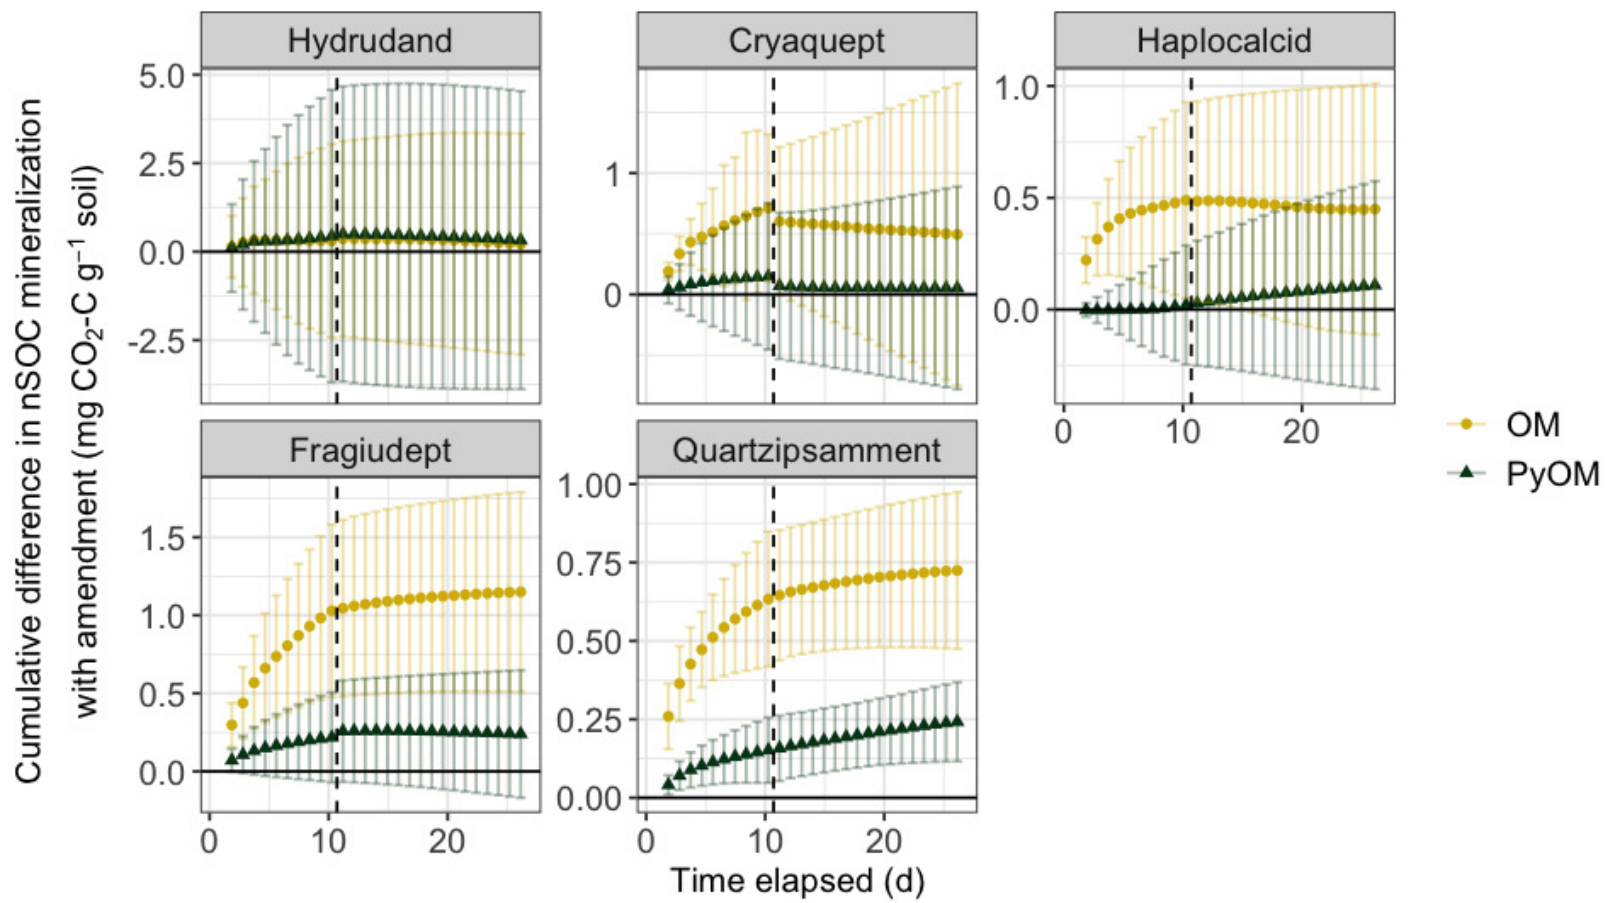

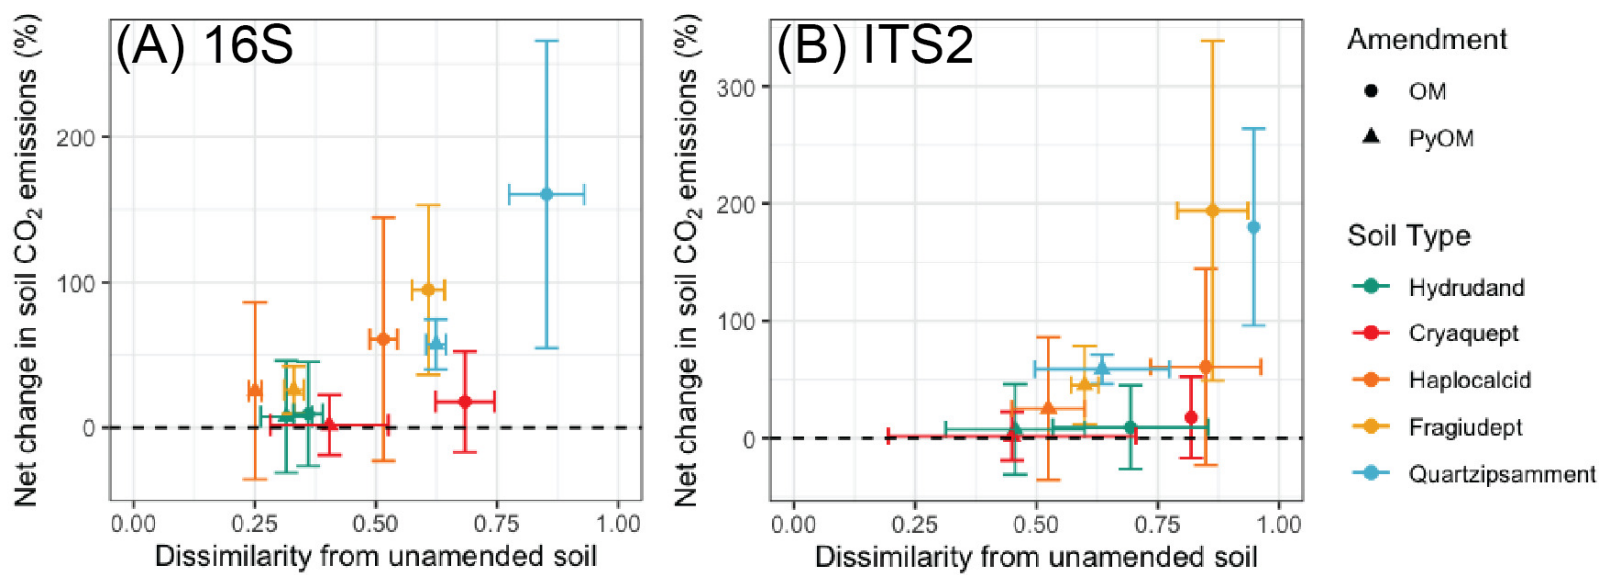



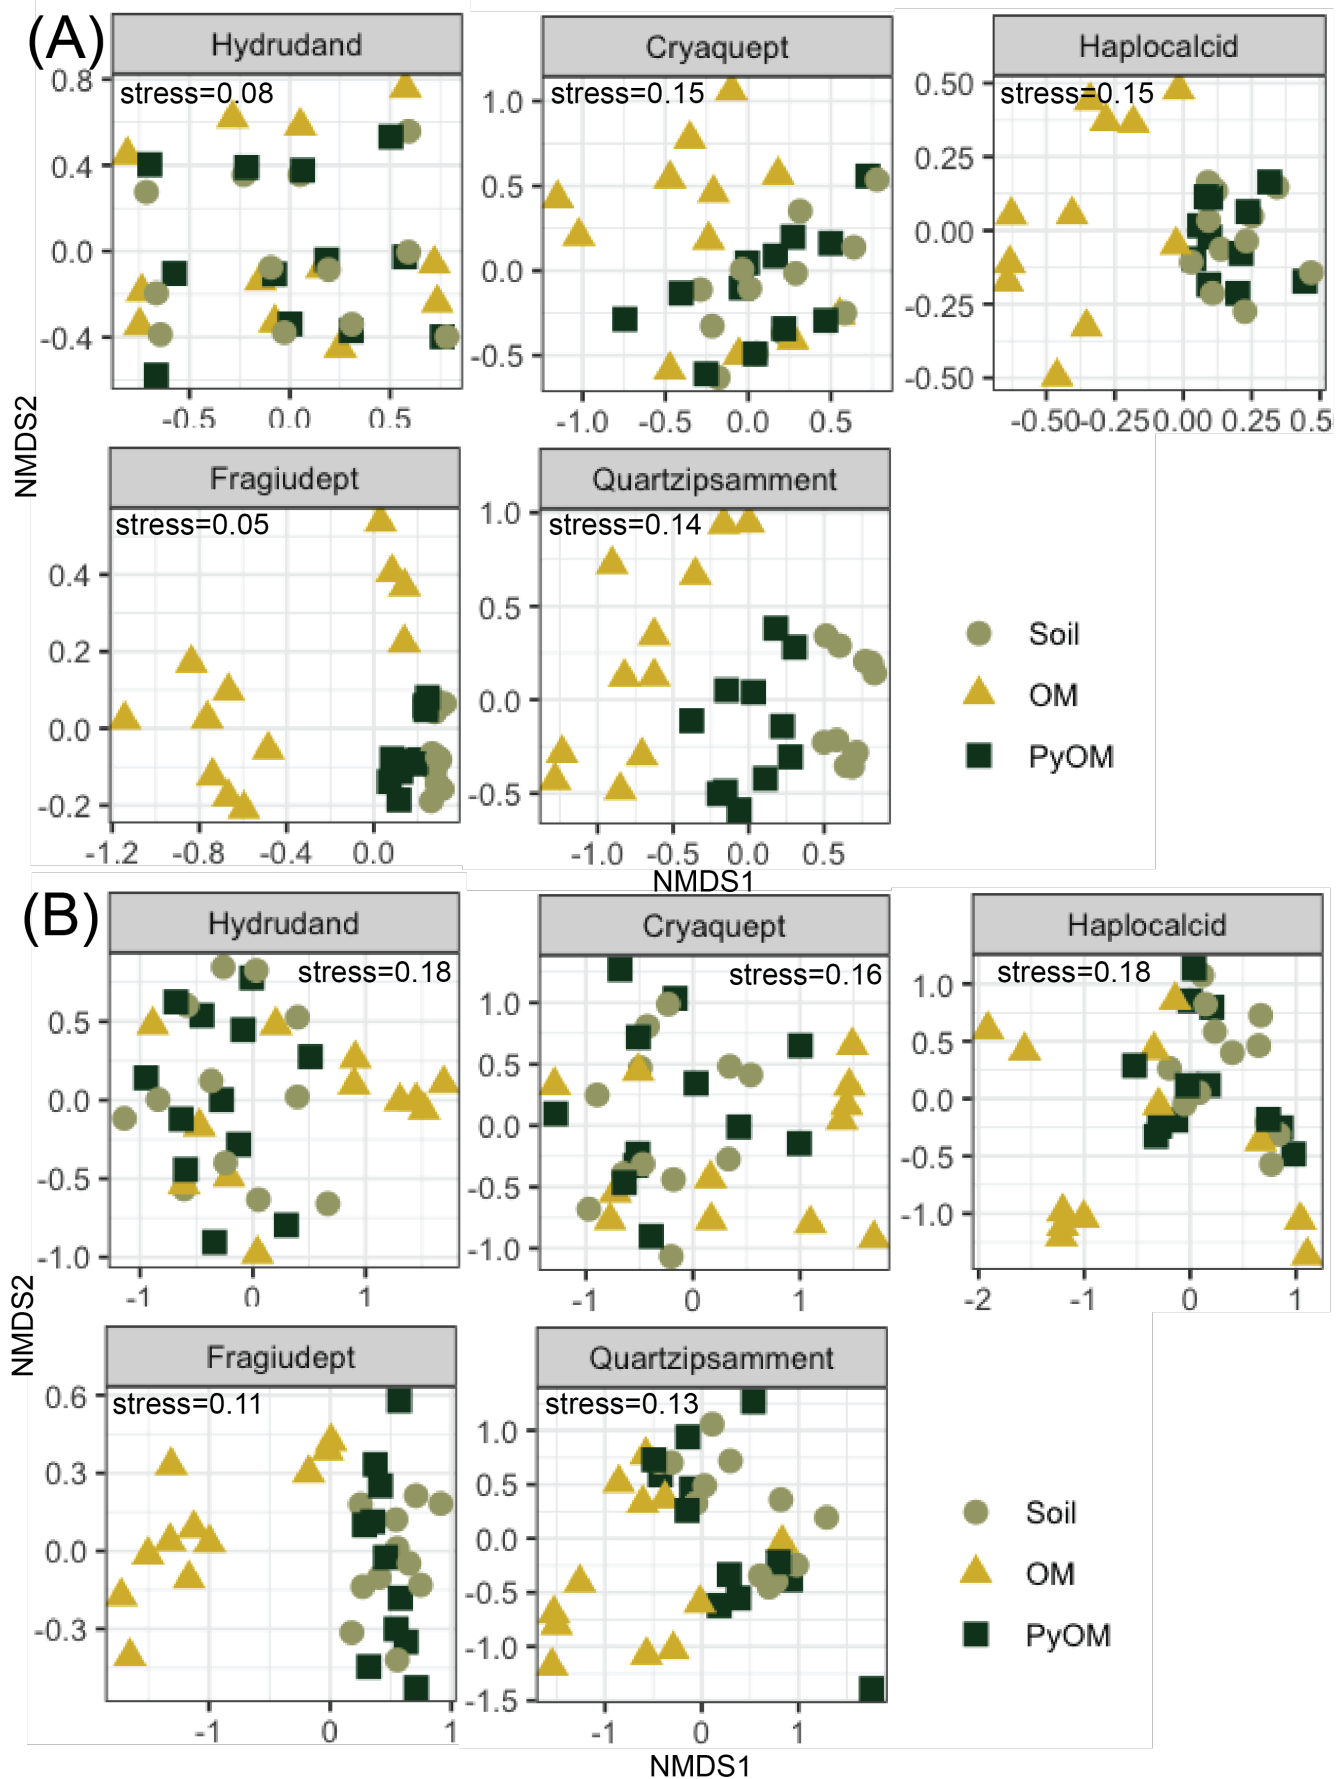



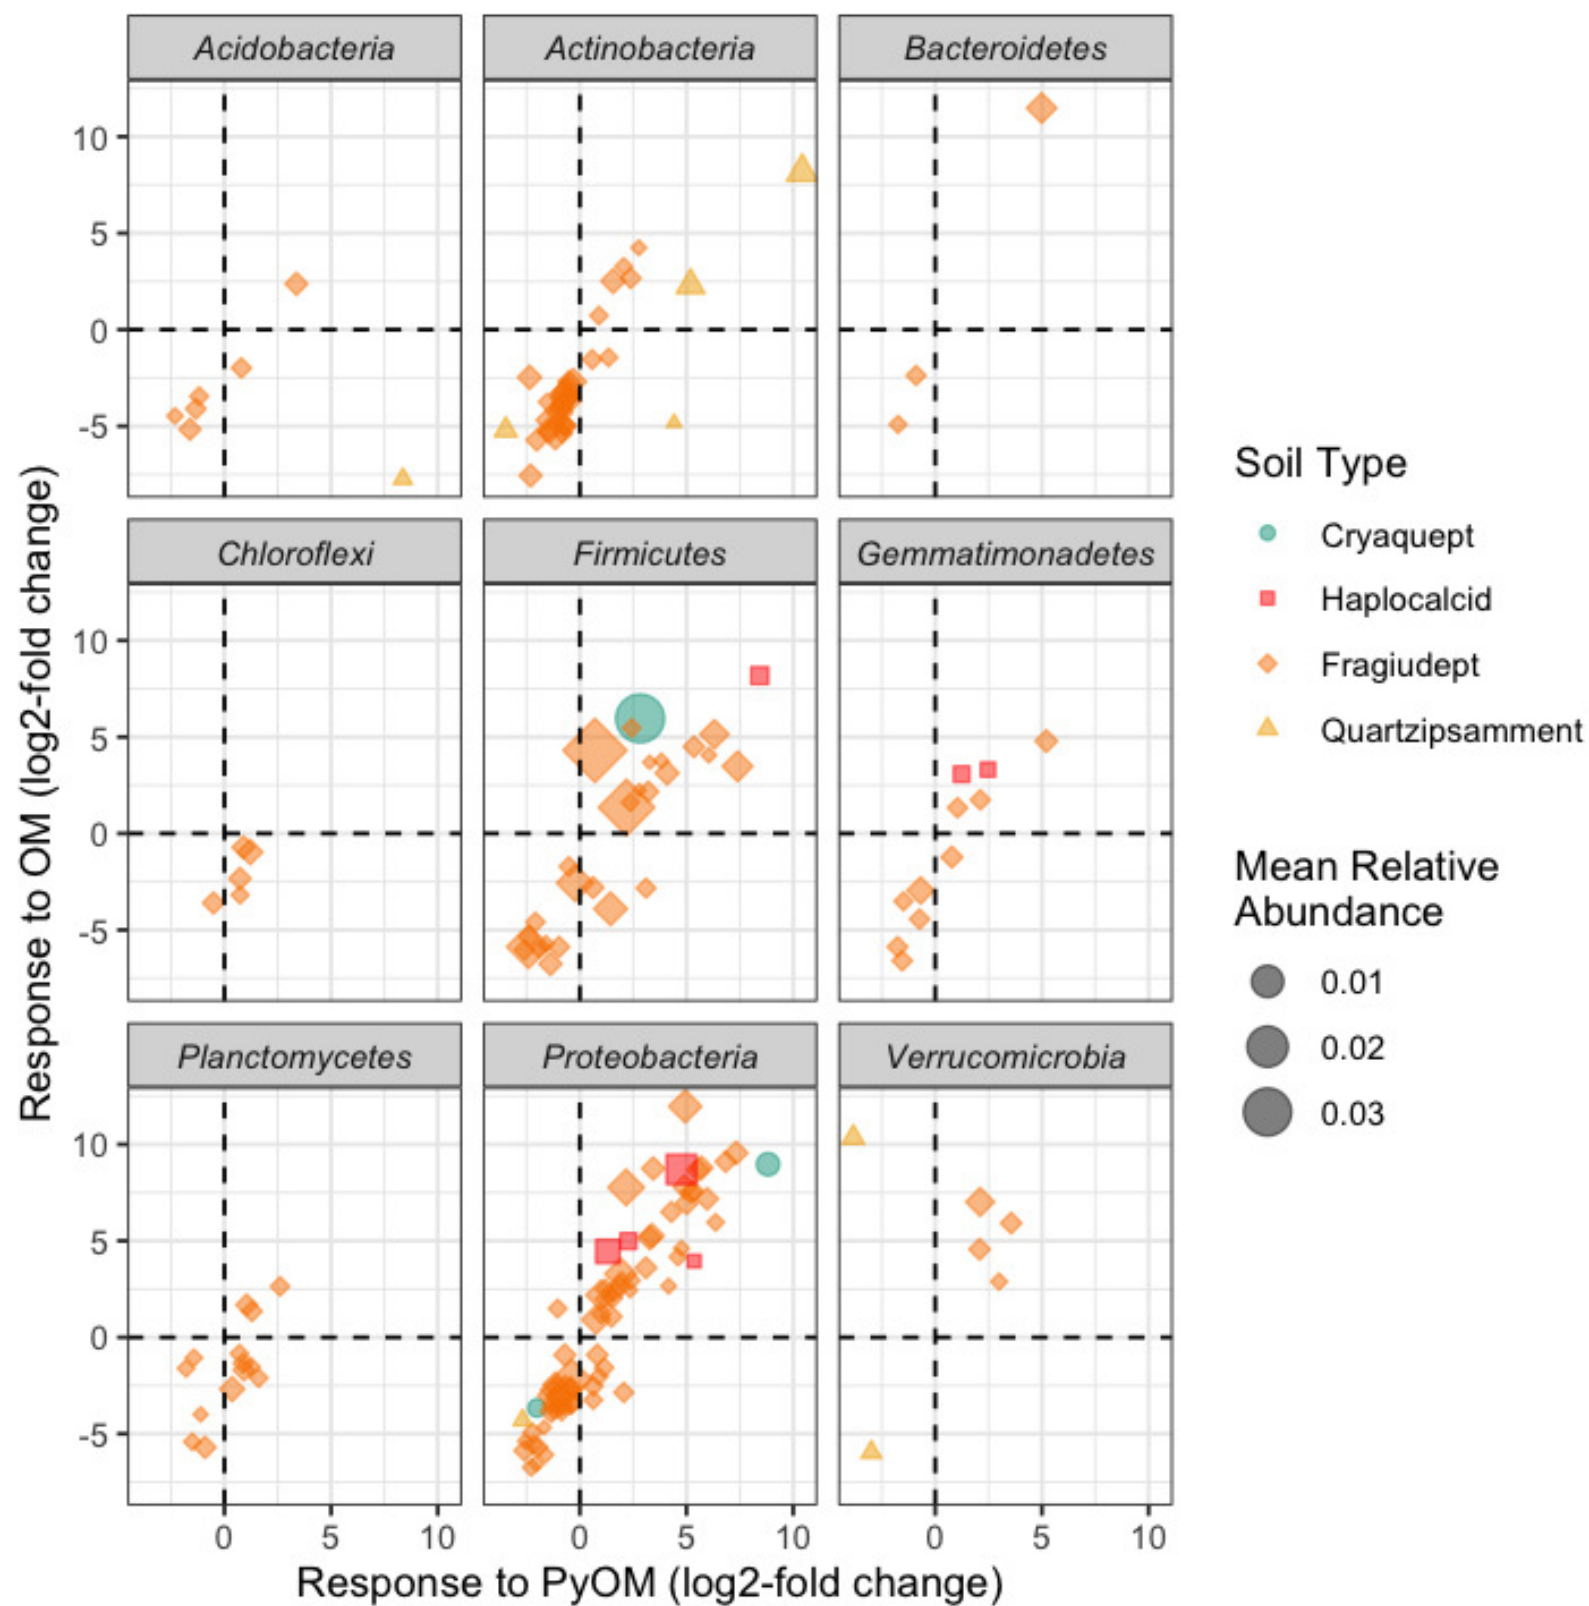

Source: https://www.biorxiv.org/content/10.1101/2020.08.12.249094v1.full.pdf
